1 ***Candidatus Nitrosocaldus cavascurensis*, an ammonia oxidizing,**  
2 **extremely thermophilic archaeon with a highly mobile genome**

3  
4  
5 **Sophie S. Abby<sup>1,2&</sup>, Michael Melcher<sup>1&</sup>, Melina Kerou<sup>1</sup>, Mart Krupovic<sup>3</sup>, Michaela**  
6 **Stieglmeier<sup>1</sup>, Claudia Rossel<sup>1</sup>, Kevin Pfeifer<sup>1</sup>, Christa Schleper<sup>1,\*</sup>**

7 <sup>1</sup> Archaea Biology and Ecogenomics Division, Dep. of Ecogenomics and Systems Biology,  
8 University of Vienna, Vienna, Austria.

9 <sup>2</sup> Univ. Grenoble Alpes, Centre National de la Recherche Scientifique (CNRS), Laboratoire  
10 Techniques de l'Ingénierie Médicale et de la Complexité - Informatique, Mathématiques et  
11 Applications, Grenoble (TIMC-IMAG), Grenoble, France.

12 <sup>3</sup> Unité Biologie Moléculaire du Gène chez les Extrêmophiles, Institut Pasteur, Paris, France.

13 &These authors contributed equally

14  
15 **CORRESPONDENCE:**

16 Prof. Christa Schleper  
17 [christa.schleper@univie.ac.at](mailto:christa.schleper@univie.ac.at)

18  
19 **KEYWORDS:** ammonia oxidation; archaea; thaumarchaeota; nitrification; mobile genetic  
20 elements; thermophily; adaptations

21  
22 **RUNNING TITLE:** Thermophilic Thaumarchaeon cultivation and genome  
23

24 **Abstract**

25 **Ammonia oxidizing archaea (AOA) of the phylum Thaumarchaeota are widespread in**  
26 **moderate environments but their occurrence and activity has also been demonstrated in**  
27 **hot springs. Here we present the first cultivated thermophilic representative with a**  
28 **sequenced genome, which allows to search for adaptive strategies and for traits that**  
29 **shape the evolution of Thaumarchaeota. *Candidatus Nitrosocaldus cavascurens* has**  
30 **been cultivated from a hot spring in Ischia, Italy. It grows optimally at 68°C under**  
31 **chemolithoautotrophic conditions on ammonia or urea converting ammonia**  
32 **stoichiometrically into nitrite with a generation time of approximately 25h. Phylogenetic**  
33 **analyses based on ribosomal proteins place the organism as a sister group to all known**  
34 **mesophilic AOA. The 1.58 Mb genome of *Ca. N. cavascurens* harbors an amoAXCB**  
35 **gene cluster encoding ammonia monooxygenase, genes for a 3-hydroxypropionate/4-**  
36 **hydroxybutyrate pathway for autotrophic carbon fixation, but also genes that indicate**  
37 **potential alternative energy metabolisms. Although a bona fide gene for nitrite**  
38 **reductase is missing, the organism is sensitive to NO-scavenging, underlining the**  
39 **importance of this compound for AOA metabolism. *Ca. N. cavascurens* is distinct**  
40 **from all other AOA in its gene repertoire for replication, cell division and repair. Its**  
41 **genome has an impressive array of mobile genetic elements and other recently acquired**  
42 **gene sets, including conjugative systems, a provirus, transposons and cell appendages.**  
43 **Some of these elements indicate recent exchange with the environment, whereas others**  
44 **seem to have been domesticated and might convey crucial metabolic traits.**

45

## 46 Introduction

47 Ammonia oxidizing archaea (AOA) now collectively classified as Nitrososphaeria within the  
48 phylum Thaumarchaeota (Brochier-Armanet et al., 2008; Spang et al., 2010; Kerou, 2016)  
49 represent the sole archaeal group that is globally distributed in oxic environments efficiently  
50 competing with aerobic bacteria. Because of their large numbers in the ocean plankton, in  
51 marine sediments, in lakes and in soils, AOA are considered one of the most abundant groups  
52 of prokaryotes on this planet (Schleper et al., 2005; Prosser and Nicol, 2008; Erguder et al.,  
53 2009; Schleper and Nicol, 2010; Pester et al., 2011; Hatzenpichler, 2012; Stahl and de la Torre,  
54 2012; Offre et al., 2013). All currently cultivated AOA strains gain energy exclusively  
55 through the oxidation of ammonia to nitrite, i.e. they perform the first step in nitrification.  
56 They grow chemolithoautotrophically from inorganic carbon supply. Some strains show  
57 growth only in the presence of small organic acids (Tourna et al., 2011; Qin et al., 2014)  
58 which seem to catalyze degradation of reactive oxygen species from the medium (Kim et al.,  
59 2016). Different from their bacterial ammonia oxidizing counterparts, AOA are often adapted  
60 to rather low levels of ammonia for growth, which seems to favor their activities in  
61 oligotrophic environments, such as the marine pelagic ocean and marine sediments, but also  
62 in acidic environments, where the concentration of ammonia decreases in favor of  
63 ammonium (Nicol et al., 2008). However, AOA occur also in large numbers in terrestrial  
64 environments, including fertilized soils and some waste water treatment plants, and several  
65 studies indicate alternative energy metabolisms (Mussmann et al., 2011; Alves et al., 2013).  
66 Although ammonia oxidation in archaea has not been biochemically resolved, the presence of  
67 genes for an ammonia monooxygenase in all AOA with remote similarity to methane and  
68 ammonia monooxygenases of bacteria implies involvement of this complex in the process  
69 (Konneke et al., 2005; Treusch et al., 2005; Nicol and Schleper, 2006). Hydroxylamine has  
70 been suggested to be the first product of ammonia oxidation (Vajjala et al., 2013), but further  
71 conversion to nitrite is performed in an unknown process, as no homolog of the bacterial  
72 hydroxylamine dehydrogenase has been found in the genomes of AOA. However, nitrous  
73 oxide (NO) has been suggested to be involved in the process, because NO production and re-  
74 consumption have been observed (Kozłowski et al., 2016b) and the NO scavenger PTIO was  
75 shown to inhibit AOA at very low concentrations (Yan et al., 2012; Shen et al., 2013; Martens-  
76 Habbenha et al., 2015).

77 Ammonia oxidation by AOA has also been documented to occur in hot springs. With the help  
78 of molecular marker genes, diverse ammonia oxidizing thaumarchaea were found in hot  
79 terrestrial and marine environments (Reigstad et al., 2008; Zhang et al., 2008; Jiang et al.,  
80 2010; Cole et al., 2013). Furthermore, *in situ* nitrification activities up to 84°C were measured  
81 using isotopic techniques in AOA-containing habitats in Iceland (Reigstad et al., 2008), in  
82 Yellowstone National park (Dodsworth et al., 2011), in a Japanese geothermal water stream  
83 (Nishizawa et al., 2016), and in enrichment cultures from Tengchong Geothermal Field in  
84 China (Li et al., 2015). In addition, an enrichment of an ammonia oxidizing thaumarchaeon,  
85 *Ca. Nitrosocaldus yellowstonii*, from a hot spring in Yellowstone National park grew up to  
86 74 °C confirming that archaeal ammonia oxidation, different from bacterial ammonia  
87 oxidation, indeed occurs at high temperatures (de la Torre et al., 2008).

88 A remarkable diversity of archaea with different metabolisms has been described from  
89 terrestrial and marine hot springs and hyperthermophilic organisms tend to be found at the  
90 base of almost all lineages of archaea. Therefore, it has often been proposed that the ancestor  
91 of all archaea and the ancestors of mesophilic lineages of archaea were hyperthermophilic or  
92 at least thermophiles (Barns et al., 1996; Lopez-Garcia et al., 2004; Gribaldo and Brochier-

93 Armanet, 2006;Brochier-Armanet et al., 2012;Eme et al., 2013). This has been supported by  
94 sequence analyses which suggested a parallel adaptation from hot to moderate temperatures  
95 in several lineages of archaea (Groussin and Gouy, 2011;Williams et al., 2017). Indeed, the  
96 thermophilic strain *Ca. Nitrosocaldus yellowstonii* emerged in 16S rRNA phylogeny as a  
97 sister group of all known mesophilic AOA (de la Torre et al., 2008) indicating that ammonia  
98 oxidizing archaea also evolved in hot environments.

99 However, until now, no genome of an obligate thermophilic AOA was available to analyze in  
100 depth the phylogenetic placement of thermophilic AOA and to investigate adaptive features  
101 of these ammonia oxidizers that have a pivotal position in understanding the evolution of  
102 Thaumarchaeota.

103 In this work we present the physiology and first genome of an extremely thermophilic AOA  
104 of the *Nitrosocaldus* lineage that we cultivated from a hot spring in Southern Italy. We  
105 analyze its phylogeny based on ribosomal proteins and reconstruct metabolic and genomic  
106 features and adaptations.

107

## 108 **Material and Methods**

### 109 *Sampling and enrichment*

110 About 500 mL of mud were sampled from a terrestrial hot spring on the Italian island Ischia  
111 at “Terme di Cavascura” and stored at 4 °C until it arrived at the laboratory in Vienna (after  
112 about one week, October 2013). The temperature of 77 °C and pH 7-8 were measured *in situ*  
113 using a portable thermometer (HANNA HI935005) and pH stripes. Initial enrichments (20mL  
114 final volume) were set up in 120 mL serum flasks (two times autoclaved with MilliQ water)  
115 containing 14 mL of autoclaved freshwater medium (FWM) (de la Torre et al., 2008;Tourna  
116 et al., 2011) amended with non-chelated trace element solution (MTE) (Konneke et al.,  
117 2005), vitamin solution, FeNaEDTA (20 µL each), 2 mM bicarbonate, 1 mM ammonium  
118 chloride and 2 mL of 0.2 µm filtrated hot spring water. Serum flasks were inoculated with 4  
119 mL (20%) of sampled mud, sealed with grey rubber stoppers (6x boiled and autoclaved) and  
120 incubated aerobically at 78 °C while rotating at 100 rpm.

121

### 122 *Enrichment Strategies*

123 The temperature was changed after one week to 70 °C and medium amendment with filtrated  
124 hot spring water was stopped after four transfers as there was no effect observed. Growth was  
125 monitored by microscopy, nitrite production and ammonia consumption. Cultures were  
126 transferred at a nitrite concentration of ~700 µM and in case ammonia was depleted before  
127 the desired nitrite concentration was reached, cultures were fed with 1 mM ammonium  
128 chloride. The antibiotics Sulfamethazine, Rifampicin and Novobiocin (100 µgmL<sup>-1</sup>) were  
129 used alone and in combination with puruvate, glyoxylate and oxalacetate (0.1 mM), but with  
130 little effect on enrichment. Filtration of enrichments with 1.2 µm filters had no or even  
131 detrimental effect on AOA abundance when done repeatedly and 0.45 µm filtration sterilized  
132 the cultures.

133 As nitrite production rate increased over time, inoculum size was decreased from 20% to  
134 10% and finally to 5%. Omitting vitamin solution from the medium led to an increase in

135 nitrite production rate and AOA abundance. Most crucial for increasing thaumarchaeal  
136 abundance was keeping an exact timing on passaging cultures in late exponential phase (after  
137 4 days) and setting up multiple cultures from which the best (based on microscopic  
138 observations) was used for further propagation.

139

#### 140 *Cultivation*

141 Cultures are routinely grown at 68 °C using 5% inoculum in 20 mL FWM amended with  
142 MTE and FeNaEDTA solutions, 1 mM NH<sub>4</sub>Cl, 2 mM NaHCO<sub>3</sub> and are transferred every 4  
143 days once they reach about 700 μM NO<sub>2</sub><sup>-</sup>.

144

#### 145 *Inhibition test with 2-phenyl-4, 4, 5, 5,-tetramethylimidazoline-1-oxyl 3-oxide (PTIO)*

146 Cultures were grown in 20 mL FWM with 5% inoculum under standard conditions and  
147 different amounts of an aqueous PTIO stock solution were added when early to mid-  
148 exponential growth phase was reached (ca. 63 h after inoculation; 20, 100 and 400 μM final  
149 PTIO concentration). Ammonia oxidation ceased immediately at all applied PTIO  
150 concentrations, but cultures with 20 μM PTIO were able to resume nitrite production 72 h  
151 after the addition of PTIO.

152

#### 153 *DNA Extraction*

154 DNA was extracted from cell pellets by bead beating in pre-warmed (65 °C) extraction buffer  
155 [40.9 gL<sup>-1</sup> NaCl, 12.6 gL<sup>-1</sup> Na<sub>2</sub>SO<sub>3</sub>, 0.1 M Tris/HCl, 50 mM EDTA, 1% sodium dodecyl  
156 sulfate (SDS)] and phenol/ chloroform/ isoamylalcohol [25:24:1 (v/v/v), Fisher  
157 BioReagents], in a FastPrep-24 (MP) for 30 s. After centrifugation (10 min, 4 °C, 16000 g)  
158 the aqueous phase was extracted with chloroform/ isoamylalcohol [24:1 (v/v)], prior to DNA  
159 precipitation with 1 μL of glycogen (20 mg.mL<sup>-1</sup>) and 1 mL of PEG-solution (93.5 gL<sup>-1</sup>  
160 NaCl, 300 gL<sup>-1</sup> polyethylene glycol 6000) overnight at 4 °C. Nucleic acid pellets were  
161 washed, dried, resuspended in nuclease-free water and stored at -20 °C until further use  
162 (adapted from (Zhou et al., 1996;Griffiths et al., 2000)).

163

#### 164 *Amplification of amoA gene*

165 Specific primers were designed for the amplification of the *amoA* gene from *Candidatus* N.  
166 cavascurensis: ThAOA-277F: CCA TAY GAC TTC ATG ATA GTC and ThAOA-632R:  
167 GCA GCC CAT CKR TAN GTC CA (R. Alves and C. Schleper, unpublished). PCR  
168 conditions were 95 °C for 10 min as initialization, followed by 35 cycles of 30 s denaturing at  
169 95 °C, 45 s primer annealing at 55 °C, and elongation at 72 °C for 45 s, finishing with 10 min  
170 final elongation at 72 °C.

171

#### 172 *Quantitative PCR*

173 Archaeal and bacterial 16s rRNA genes were quantified in triplicate 20 μL reactions  
174 containing 10 μL GoTaq<sup>®</sup> qPCR Master Mix 2x (Promega), 0.2 mg mL<sup>-1</sup> BSA and 1 μM of  
175 the appropriate primers : Arch931F [5'-AGG AAT TGG CGG GGG AGC A-3' (Jackson et  
176 al., 2001) and Arch1100R [5'-BGG GTC TCG CTC GTT RCC-3' (Ovreas et al., 1997)] for  
177 the archaeal 16S rRNA gene, P1 (5'-CCT ACG GGA GGC AGC AG-3') and P2 (5'-ATT

178 ACC GCG GCT GCT GG-3') (Muyzer et al., 1993) for the bacterial 16S rRNA gene.  
179 Reactions were performed in a realplex<sup>2</sup> (Mastercycler ep gradient S, Eppendorf AG) with the  
180 following cycling conditions: 95 °C for 2 min, followed by 40 cycles of 30 s denaturing at 95  
181 °C, 30 s joint annealing-extension at 60 °C, and extension with fluorescence measurement at  
182 60 °C for 30 s. Specificity of qPCR products was confirmed by melting curve analysis.  
183 Standards were prepared by cloning 16S rRNA genes from *Ca. N. cavascurensis* and *E. coli*  
184 into pGEM<sup>®</sup>-T Easy Vectors (Promega). These were amplified using M13 primers and  
185 concentration was determined with Qubit<sup>™</sup> dsDNA BR Assay Kit (Thermo Fisher Scientific)  
186 before preparing serial dilutions. The efficiencies of archaeal and bacterial 16S rRNA  
187 standards were 95% and 99%, respectively.  
188

#### 189 *Fluorescence in situ hybridization*

190 2 mL samples were centrifuged at 4°C, 16000 g for 40 min, washed in PBS-buffer and fixed  
191 with 4% paraformaldehyde for 3 h using standard protocols (Amann et al., 1990). Cells were  
192 washed two times with 1 mL PBS and finally resuspended in 200 µL of 1:1 PBS:ethanol mix  
193 before storing them at -20 °C. After dehydration in ethanol cells were hybridized overnight in  
194 hybridisation buffer with 20% formamide using probes Eub338 (Flous) 5'-GCT GCC TCC  
195 CGT AGG AGT-3' (Amann et al., 1990) and Arch915 (dCy3) 5'-GTG CTC CCC CGC CAA  
196 TTC CT-3' (Stahl and Amann, 1991).  
197

#### 198 *Scanning Electron Microscopy*

199 For scanning electron microscopy, late exponential cells were harvested from 40 ml of  
200 culture by centrifugation (16000 g, 4 °C, 30 min). The cells were resuspended and washed  
201 three times (0.02 mM sodium cacodylate) prior to prefixation (0.5% glutaraldehyde in 0.02  
202 mM sodium cacodylate) overnight, after which the concentration of glutaraldehyde was  
203 increased to 2.5% for 2h. Fixed cells were spotted onto 0.01%-poly-l-lysine coated glass  
204 slides (5 mm) and allowed to sediment for 15 min. Samples were then dehydrated using an  
205 ethanol series (30%-100%; 15 min per step) and dried by acetone (2x 100%) and HMDS  
206 (2x50%; 2x100%) substitution. The slides were subsequently placed on conductive stubs,  
207 gold coated for 30 seconds (JEOL JFC-2300HR) and analyzed (JEOL JSM-IT200).  
208

#### 209 *Genome assembly*

210 DNA was prepared from 480 mL culture using standard procedures and sequenced using a  
211 PacBio Sequel sequencer at the VBCF (Vienna BioCenter Core Facilities GmbH). Insert size  
212 was 10 kb. Around 500000 reads were obtained with an average size of ~5 kb (N50: 6866 nt,  
213 max read length: 84504 nt).

214 The obtained PacBio reads were assembled using the CANU program (version 1.4,  
215 parameters "genomeSize=20m, corMhapSensitivity=normal, corOutCoverage=1000,  
216 errorRate=0.013") (Koren et al., 2017), and then "polished" with the arrow program from the  
217 SMRT analysis software (Pacific Biosciences, USA). The *Ca. N. cavascurensis* genome  
218 consisted of two contiguous, overlapping contigs of 1580543 kb and 15533 kb. A repeated  
219 region between both extremities of the longest contig, and the 2<sup>nd</sup> small contig obtained was  
220 found, and analysed using the nucmer program from the MUMMER package (see Figure  
221 Sup. 1) (Kurtz et al., 2004). This region was merged using nucmer results, and the longest  
222 contig obtained was "circularized" using the information of the nucmer program, as sequence  
223 information from the 2<sup>nd</sup> contig was nearly identical (>99.5%) to that of the extremities of the  
224 long contig. The origin of replication was predicted using Ori-Finder 2 webserver (Luo et al.,



225 2014). By analogy with *N. maritimus*, it was placed after the last annotated genomic object,  
226 before the ORB repeats and the *cdc* gene. The annotated genome sequence has been  
227 deposited into GenBank under accession number XXXXX.

228

#### 229 *Genome dataset*

230 Thaumarchaeota and Aigarchaeota complete or nearly-complete genomes were downloaded  
231 from the NCBI, Genbank database, or IMG database when not available in Genbank. We  
232 included the genomes of 27 Thaumarchaeota: Thaumarchaeota archaeon BS4  
233 (IMG\_2519899514); Thaumarchaeota group 1.1c (bin Fn1) (IMG\_2558309099);  
234 Thaumarchaeota NES-775 (Offre and Schleper, unpublished); Thaumarchaeota archaeon  
235 DS1 (IMG\_2263082000); *Cenarchaeum symbiosum* A (DP000238); Thaumarchaeota  
236 archaeon CSP1 (LDXL00000000); *Nitrosopumilus adriaticus* NF5 (CP011070);  
237 *Nitrosocosmicus arcticus* Kfb (Alves and Schleper unpublished); *Nitrosopelagicus brevis*  
238 CN25 (CP007026); *Nitrosotenuis chungbukensis* MY2 (AVSQ00000000); *Nitrosotalea*  
239 *devanaterre* Nd1 (LN890280); *Nitrososphaera evergladensis* SR1 (CP007174);  
240 *Nitrosocosmicus exaquare* G61 (CP017922); *Nitrososphaera gargensis* Ga9.2 (CP002408);  
241 *Nitrosoarchaeum koreensis* MY1 (GCF\_000220175); *Nitrosopumilus salaria* BD31  
242 (GCF\_000242875); *Nitrosopumilus koreensis* AR1 (CP003842); *Nitrosoarchaeum limnia*  
243 BG20 (GCF\_000241145); *Nitrosoarchaeum limnia* SFB1 (CM001158); *Nitrosopumilus*  
244 *maritimus* SCM1 (CP000866); *Nitrosocosmicus oleophilus* MY3 (CP012850);  
245 *Nitrosopumilus piranensis* D3C (CP010868); *Nitrosopumilus sediminis* AR2 (CP003843);  
246 *Nitrosotenuis uzonensis* N4 (GCF\_000723185); *Nitrososphaera viennensis* EN76  
247 (CP007536); *Nitrosotenuis cloacae* SAT1 (CP011097); *Nitrosocaldus cavascurensis* SCU2  
248 (this paper).

249 Two Aigarchaeota genomes were included: *Calditenuis aerorheumensis* (IMG\_2545555825)  
250 and *Caldiarchaeum subterraneum* (BA000048). Additionally, we selected 11 Crenarchaeota  
251 genomes from Genbank to serve as an outgroup in our analysis: *Sulfolobus solfataricus* P2  
252 (AE006641); *Pyrobaculum aerophilum* IM2 (AE009441); *Hyperthermus butylicus* DSM  
253 5456 (CP000493); *Thermofilum pendens* Hrk 5 (CP000505); *Acidilobus saccharovorans* 345-  
254 15 (CP001742); *Desulfurococcus fermentans* DSM 16532 (CP003321); *Caldisphaera*  
255 *lagunensis* DSM 15908 (CP003378); *Fervidicoccus fontis* Kam940 (CP003423);  
256 *Metallosphaera sedula* DSM 5348 (CP000682); *Aeropyrum pernix* K1 (BA000002) and  
257 *Thermoproteus tenax* Kra 1 (FN869859).

258

#### 259 *Genome annotation*

260 The first annotation of the *Ca. N. cavascurensis* genome was obtained by the automatic  
261 annotation pipeline MicroScope (Vallenet et al., 2009;Medigue et al., 2017;Vallenet et al.,  
262 2017). Annotations from *Nitrososphaera viennensis* EN76 were carried over when aligned  
263 sequences were 35% identical (or 30% in syntenic regions) and covered 70% of the sequence.  
264 All subsequent manual annotations were held on the platform. Putative transporters were  
265 classified by screening against the Transporter Classification Database (Saier et al., 2014). To  
266 assist the annotation process, several sets of proteins of interest from Kerou et al. 2016 (EPS,  
267 metabolism), Offre et al. 2014 (transporters), Makarova et al. 2016 (archaeal pili and flagella)  
268 and ribosomal proteins (Offre et al., 2014;Kerou et al., 2016;Makarova et al., 2016) were  
269 screened specifically within our set of genomes using HMMER and HMM protein profiles  
270 obtained from databases (TIGRFAM release 15, PFAM release 28, SUPERFAMILY version  
271 1.75), or built from arCOG families (Gough et al., 2001;Haft et al., 2003;Finn et al.,  
272 2014;Makarova et al., 2015). In the former case, the trusted cutoff “—cut\_tc” was used if

273 defined in the profiles. In the latter case, for each family of interest, sequences were extracted  
274 from the arCOG2014 database, aligned using MAFFT ("linsi" algorithm) (Kato and  
275 Standley, 2014), and automatically trimmed at both extremities of conserved sequence blocks  
276 using a home-made script relying on blocks built by BMGE v1.12 (BLOSUM 40) (Criscuolo  
277 and Gribaldo, 2010). HMMER was then used to screen genomes for different sets of  
278 specialized families (Eddy, 2011).

279 In order to visualize and compare the genetic organization of sets of genes (AMO, Ure, type  
280 IV pili), we built HMM profiles (as above except alignments were manually curated for  
281 AMO and Ure), based on the corresponding arCOG families and integrated the respective  
282 sets of profiles in the MacSyFinder framework that enables the detection of sets of co-  
283 localized genes in the genome (parameters `inter_gene_max_space = 10`,  
284 `min_nb_mandatory_genes = 1` for AMO and Ure, `inter_gene_max_space = 10`,  
285 `min_nb_mandatory_genes = 4` for type IV pili) (Abby et al., 2014). MacSyFinder was then  
286 run with the models and profiles on the genome dataset, and the resulting JSON files were  
287 used for visualization in the MacSyView web-browser application (Abby et al., 2014). The  
288 SVG files generated by MacSyView from the predicted operons were downloaded to create  
289 figures.

290

### 291 *Reference phylogeny*

292 Ribosomal proteins were identified in genomes using a set of 73 HMM profiles built for 73  
293 arCOG families of ribosomal proteins (see Genome annotation section). When multiple hits  
294 were obtained in a genome for a ribosomal protein, the best was selected. The sequences  
295 were extracted and each family was aligned using the MAFFT program ("linsi" algorithm)  
296 (Kato and Standley, 2014). Alignments were curated with BMGE (version 1.12, default  
297 parameters and BLOSUM 45) (Criscuolo and Gribaldo, 2010) and then checked manually. In  
298 several cases, sequences identified as part of a given ribosomal protein family did not align  
299 well and were excluded from the analysis. In the end, 59 families with more than 35 genomes  
300 represented were selected to build a phylogeny. The corresponding family alignments were  
301 concatenated, and a tree was built using the IQ-Tree program version 1.5.5 (Nguyen et al.,  
302 2015) (model test, partitioned analysis with the best model selected per gene, 1000 UF-Boot  
303 and 1000 aLRT replicates). A tree drawing was obtained with the Scriptree program  
304 (Chevenet et al., 2010), and then modified with Inkscape.

305

### 306 *Protein families reconstruction and phyletic patterns analysis*

307 Homologous protein families were built for the set of genomes selected. A blast all sequences  
308 against all was performed, and the results used as input for the Silix and Hifix programs to  
309 cluster the sets of similar sequences into families (Miele et al., 2011; Miele et al., 2012). For  
310 sequences to be clustered in a same Silix family, they had to share at least 30% of identity  
311 and the blast alignment cover at least 70% of the two sequences lengths. The distribution of  
312 protein families of interest was analyzed across the genome dataset.

313

### 314 *Phylogenetic analyses*

315 Sequences from Silix families of interest were extracted in fasta files, and a similarity search  
316 was performed against a large database of sequences which consisted of 5750 bacterial and  
317 archaeal genomes (NCBI Refseq, last accessed in November 2016), and the genomes from  
318 our genome dataset. Sequences with a hit having an e-value below  $10^{-10}$  were extracted, and



319 the dataset was then de-replicated to remove identical sequences. An alignment was then  
320 obtained for the family using MAFFT (linsi algorithm), filtered with BMGE (BLOSUM 30)  
321 and a phylogenetic tree was reconstructed by maximum-likelihood using the IQ-Tree  
322 program (version 1.5.5, best evolutionary model selected, 1000 UF-Boot and 1000 aLRT  
323 replicates). A tree drawing was obtained with the Scriptree program (Chevenet et al., 2010),  
324 and modified with Inkscape.

325

### 326 *Identification and annotation of integrated MGEs*

327 Integrated mobile genetic elements were identified as described previously (Kazlauskas et al.,  
328 2017). Briefly, the integrated MGEs were identified by searching the *Ca. N. cavascurensis*  
329 genome for the presence of the hallmark genes specific to mobile genetic elements, such as  
330 integrases, casposases, VirB4 ATPases, large subunit of the terminase, major capsid proteins  
331 of archaeal viruses, etc. In the case of a positive hit, the corresponding genomic  
332 neighborhoods were analysed further. IS elements were searched for using ISfinder (Siguiar  
333 et al., 2006). The precise borders of integration were defined based on the presence of direct  
334 repeats corresponding to attachment sites. The repeats were searched for using Unipro  
335 UGENE (Okonechnikov et al., 2012). Genes of integrated MGE were annotated based on  
336 PSI-BLAST searches (Altschul et al., 1997) against the non-redundant protein database at  
337 NCBI and HHpred searches against CDD, Pfam, SCOPe and PDB databases (Soding, 2005).

338

## 339 **Results and Discussion**

### 340 *Enrichment of Ca. Nitrosocaldus cavascurensis*

341 An ammonium oxidizing enrichment culture was obtained from thermal water outflow of the  
342 *Terme di Cavascura* on the Italian island Ischia. After repeated transfers into artificial  
343 freshwater medium supplemented with 1 mM ammonium and 2 mM bicarbonate, highly  
344 enriched cultures were obtained that exhibited almost stoichiometric conversion of  
345 ammonium into nitrite within 4 to 5 days (Fig. 1A). A single phylotype of AOA but no AOB  
346 or Nitrospira/commamox was identified in the enrichment via amplification and sequencing  
347 of *amoA* and 16S rRNA gene fragments (data not shown) and the presence of a single AOA  
348 phylotype was confirmed by metagenomic sequencing (see below). Its closest relative in the  
349 16S rRNA database was fosmid 45H12 isolated from a gold mine metagenome with 99%  
350 identity and the next closest cultivated relative was *Ca. Nitrosocaldus yellowstonii* with 96%  
351 identity (Nunoura et al., 2005; de la Torre et al., 2008). The AOA has been propagated for  
352 four years within a stable enrichment culture and its relative enrichment usually ranged  
353 between 75 and 90% based on qPCR or cell counts respectively. Diverse attempts to obtain a  
354 pure culture (heat treatment, antibiotics, dilution to extinction, filtration) resulted in higher  
355 enrichments of up to 92% (based on cell counts) but not in a pure culture. In high throughput  
356 sequencing analyses using general prokaryotic primers to amplify the V2/V4 region of the  
357 16S rRNA gene we identified phlotypes of the Deinococcus/Thermus group at up to 97% of  
358 the bacterial contaminating sequences (with 96% identity to sequences from the *Thermus*  
359 genus) and to minor extent sequences related to the Chloroflexi and Armatimonadetes (not  
360 shown). Although Aigarchaeota had been detected in earlier enrichments, the AOA was the  
361 only archaeon discovered in the high-level enrichments used in this study.

362 The shortest generation time of the thermophilic AOA was approximately 25 h, as measured  
363 by nitrite production rates and in qPCR, which is comparable to the generation time of *Ca. N.*  
364 *yellowstonii* (de la Torre et al., 2008). It grew in a temperature range from about 55 to 74°C  
365 with an apparent (but relatively wide) temperature optimum around 68°C (Fig. 2).

366  
367 In fluorescence *in situ* hybridizations (FISH) with archaea- and bacteria-specific probes, all  
368 coccoid-shaped cells of less than 1 µm in diameter were assigned to the AOA, while all  
369 shorter and longer rod-shaped morphotypes were clearly assigned to bacteria (Fig. 3A, B).  
370 Scanning electron microscopy revealed the typical spherical and irregular shape of cocci, as  
371 seen e.g., for the ammonia oxidizing archaeon *Nitrososphaera viennensis* (Tourna et al.,  
372 2011) or hyperthermophilic and halophilic coccoid archaea strains with a diameter of around  
373 0.7 µm (Fig. 3C, D). Based on its relationship with *Ca. Nitrosocaldus yellowstonii* (de la  
374 Torre et al., 2008), and the location it was sampled from (*Terme di cavascura*, Italy) we  
375 named this organism provisionally *Candidatus Nitrosocaldus cavascurensis*.

376  
377 *Ca. Nitrosocaldus cavascurensis* represents a deeply branching lineage of AOA

378 We gathered all complete or nearly-complete 27 genome sequences available for  
379 Thaumarchaeota. Those included 23 genomes of closely-related cultivated or uncultivated  
380 AOA all harboring *amo* genes, and four genomes obtained from metagenomes that do not  
381 have genes for ammonia oxidation. Among the latter were two assembled genomes from  
382 moderate environments (Fn1 and NESA-775) and two from hot environments (BS4 and DS1)  
383 (Beam et al., 2014; Lin et al., 2015). In addition, two Aigarchaeota genomes, and a selection  
384 of representative genomes of Crenarchaeota (11) were included to serve as outgroups  
385 (Petitjean et al., 2014; Raymann et al., 2015; Adam et al., 2017; Williams et al., 2017). This  
386 resulted in a 40 genomes dataset (Material and Methods). A maximum likelihood analysis  
387 based on 59 concatenated ribosomal proteins (in one copy in at least 35 of the 40 genomes)  
388 resulted in a highly-supported tree (UF-boot and aLRT support) (Fig. 3). It confirms the  
389 monophyly of Thaumarchaeota and Nitrososphaeria (AOA), and the deeply-branching  
390 position of *Ca. N. cavascurensis* as a sister-group of all other (mesophilic) AOA, as initially  
391 indicated with a single gene (16S rRNA) phylogeny of *Ca. Nitrosocaldus yellowstonii* (de la  
392 Torre et al., 2008).

393  
394 *Genome and energy metabolism of Ca. Nitrosocaldus cavascurensis*

395 The genome of *Ca. N. cavascurensis* contains 1.58 Mbp, with 1748 predicted coding  
396 sequences, one 16S/23S rRNA operon and 29 tRNA genes. It has a G+C content of 41.6%.  
397 Similar to the genomes of most marine strains (Nitrosopumilales) and to *Ca. Nitrosocaldus*  
398 *yellowstonii*, but different from those of the terrestrial organisms (Nitrososphaerales) it  
399 encodes all putative subunits of the ammonia monooxygenase in a single gene cluster of the  
400 order *amoA*, *amoX*, *amoC*, *amoB* (Fig. 4) indicating that this might represent an ancestral  
401 gene order. Different from several other AOA it has a single copy of *amoC*. The genome  
402 contains a cluster of genes for the degradation of urea, including the urease subunits and two  
403 urea transporters (Fig. 4 and 5) with a similar structure to the urease locus of

404 Nitrososphaerales. Accordingly, growth on urea, albeit slower than on ammonia, could be  
405 demonstrated (Fig. 1B). Urease loci were so far found in all Nitrososphaerales genomes, and  
406 in some Nitrosopumilales (Hallam et al., 2006; Park et al., 2012; Spang et al., 2012; Bayer et  
407 al., 2016). No urease cluster could be found in non-AOA Thaumarchaeota, nor in  
408 Aigarchaeota. In Crenarchaeota, only one Sulfolobales genome harbored a urease  
409 (*Metallosphaera sedula* DSM 5348). A specific protein family of a putative chaperonin  
410 (Hsp60 homolog, arCOG01257) was found to be conserved within the urease loci of *Ca. N.*  
411 *cavascurensis* and the Nitrososphaerales (“soil-group” of AOA) (Fig. 4) as also observed in  
412 some bacteria (e.g., in *Haemophilus influenzae*). Unlike the conserved “thermosome” Hsp60  
413 (also part of arCOG01257), this particular Hsp60 homolog was not found in any  
414 Nitrosopumilales genome. Given the conservation of the urease loci between *Ca.*  
415 *Nitrosocaldus* and Nitrososphaerales, it is possible that these genes have a common origin, and  
416 were acquired *en bloc* from bacteria by the ancestor of AOA. It is likely that the Hsp60  
417 homolog is involved in stabilization of the urease, as demonstrated in the  
418 deltaproteobacterium *Helicobacter pylori* (Evans et al., 1992).

419 Intriguingly, a gene encoding a nitrite reductase that is present in all genomes of AOA  
420 (except the sponge symbiont, *Ca. Cenarchaeum symbiosum*, (Bartossek et al., 2010)) and  
421 which is highly transcribed during ammonia oxidation in *N. viennensis* (Kerou et al., 2016)  
422 and in meta-transcriptomic datasets (Shi et al., 2011) is missing from the genome. Nitrite  
423 reductases have been postulated to be involved in ammonia oxidation by providing nitric  
424 oxide (NO) for the oxidation step to nitrite (Kozłowski et al., 2016a). We therefore tested, if  
425 the organism was affected by the NO-scavenger PTIO which inhibited at low concentrations  
426 all AOA tested so far (Martens-Habbena et al., 2015; Kozłowski et al., 2016a). Ammonia  
427 oxidation of *Ca. N. cavascurensis* was fully inhibited at concentrations as low as 20  $\mu$ M,  
428 similar to those affecting *N. viennensis* and *N. maritimus* (Fig. 6). This indicates that NO is  
429 produced by an unknown nitrite reductase or perhaps by an unidentified hydroxylamine  
430 dehydrogenase (HAO), as recently shown for the HAO of the ammonia oxidizing bacterium  
431 *Nitrosomonas europaea* (Caranto and Lancaster, 2017). Alternatively, NO might be supplied  
432 through the activity of other organisms in the enrichment culture. Indeed we found a *nirK*  
433 gene in the genome of the Deinococcus species of our enrichment culture. The sensitivity to  
434 PTIO reinforces the earlier raised hypothesis that NO represents an important intermediate or  
435 cofactor in ammonia oxidation in archaea (Schleper and Nicol, 2010; Simon and Klotz,  
436 2013; Kozłowski et al., 2016b).

437  
438 Pathways of central carbon metabolism and -fixation of *Ca. N. cavascurensis* were found to  
439 be generally similar to those of other AOA, underlining the strikingly high similarity and  
440 conservation of metabolism within the Nitrososphaeria (Fig. 5) (Kerou et al., 2016)).

441 Key enzymes of the 3-hydroxypropionate/4-hydroxybutyrate carbon fixation pathway were  
442 identified in the genome of *Ca. N. cavascurensis* (supplementary table 1, (Konneke et al.,  
443 2014)). Intriguingly, and similar to *Sulfolobales*, we find two copies of the gene encoding for  
444 4-hydroxybutyryl-CoA dehydratase located in tandem. The first copy (NCAV\_0127) is  
445 homologous to the other AOA sequences which are more closely related to fermenting  
446 Clostridia rather than their crenarchaeal counterparts (“Cren Type-1”, Fig. S2), while the

447 second copy (NCAV\_0126) exhibits high similarity to genes from bacterial candidate  
448 division NC10 and Handelsmanbacteria (49% identity). In a phylogenetic tree of the protein  
449 family, it clusters together with the second group of crenarchaeal genes ("Cren Type-2", Fig.  
450 S2, Material and Methods) which lack essential catalytic residues and which function remains  
451 unknown (Ramos-Vera et al., 2011). Könneke et al. 2014 suggested an independent  
452 emergence of the cycle in Thaumarchaeota and autotrophic Crenarchaeota based on the  
453 unrelatedness of their respective enzymes (Konneke et al., 2014). But the existence of the  
454 second gene in this deep-branching lineage rather indicates that both genes could have been  
455 present in a common ancestor of Crenarchaeota and Thaumarchaeota and that their CO<sub>2</sub>  
456 fixation pathways could have a common origin. No homolog of the experimentally  
457 characterized malonic semialdehyde reductase from *N. maritimus* (Otte et al., 2015), or any  
458 other iron-containing alcohol dehydrogenase protein family member, was found in the *Ca. N.*  
459 *cavascurensis* genome, indicating potentially the later recruitment of this enzyme, or a case of  
460 non-orthologous gene replacement. A full oxidative TCA cycle is present in *Ca. N.*  
461 *cavascurensis*, including a malic enzyme and a pyruvate/phosphate dikinase connecting the  
462 cycle to gluconeogenesis. Additionally, and like most mesophilic AOA, *Ca. N. cavascurensis*  
463 encodes a class III polyhydroxyalkanoate synthase (phaEC) allowing for the production of  
464 polyhydroxyalkanoates, carbon polyester compounds that form during unbalanced growth  
465 and serve as carbon and energy reserves (Poli et al., 2011; Spang et al., 2012) (Supplementary  
466 Table 1 and Fig. 5).

467 The presence of a full set of genes encoding for the four subunits (and maturation factors) of  
468 a soluble type 3b [NiFe]-hydrogenase, uniquely in *Ca. N. cavascurensis*, indicates the ability  
469 to catalyze hydrogen oxidation potentially as part of the energy metabolism. This group of  
470 hydrogenases is typically found among thermophilic archaea, is oxygen-tolerant and  
471 bidirectional, and can couple oxidation of H<sub>2</sub> to reduction of NAD(P) in order to provide  
472 reducing equivalents for biosynthesis, while some have been proposed to have  
473 sulfhydrogenase activity (Kanai et al., 2011; Peters et al., 2015; Greening et al., 2016) (and  
474 references therein). Although classified by sequence analysis (Sondergaard et al., 2016) and  
475 subunit composition as a type 3b hydrogenase, the alpha and delta subunits belong to the  
476 arCOG01549 and arCOG02472 families respectively, which contain coenzyme F<sub>420</sub>-reducing  
477 hydrogenase subunits, so far exclusively found in methanogenic archaea. Given the fact that  
478 Thaumarchaeota can synthesize this cofactor and encode a number of F<sub>420</sub>-dependent  
479 oxidoreductases with a yet unknown function, it is interesting to speculate whether oxidized  
480 F<sub>420</sub> could also be a potential substrate for the hydrogenase. Expression of the hydrogenase is  
481 likely regulated through a cAMP-activated transcriptional regulator encoded within the  
482 hydrogenase gene cluster (Supplementary Table 1).

483

#### 484 *Adaptations to thermophilic life*

485 The molecular adaptations that enable survival and the maintenance of cell integrity at high  
486 temperatures have been the subject of intense studies since the discovery of thermophilic  
487 organisms. The issue of extensive DNA damage occurring at high temperatures has led to the  
488 study of systems of DNA stabilization and repair in thermophilic and hyperthermophilic  
489 archaea. Among them, the reverse gyrase, a type IA DNA topoisomerase shown to stabilize  
490 and protect DNA from heat-induced damage, is often (but not always (Brochier-Armanet and  
491 Forterre, 2007)) found in thermophiles, and is even considered a hallmark of  
492 hyperthermophilic organisms growing optimally above 80°C (Bouthier de la Tour et al.,  
493 1990; Forterre, 2002). However, the gene might not always be essential for survival at high  
494 temperature in the laboratory (Atomi et al., 2004; Brochier-Armanet and Forterre, 2007).



495 Interestingly, we could not identify a gene encoding for reverse gyrase in the genome of *Ca.*  
496 *N. cavascurensis*. This might either reflect that its growth optimum is at the lower end of  
497 extreme thermophiles or that there is a separate evolutionary line of adaptation to  
498 thermophily possible without reverse gyrase.

499  
500 The following DNA repair mechanisms were identified in the genome of *Ca. N.*  
501 *cavascurensis*, in agreement with the general distribution of these systems in thermophiles  
502 (for reviews see (Rouillon and White, 2011;Grasso and Tell, 2014;Ishino and Narumi,  
503 2015)):

504 a) Homologous recombination repair (HR): Homologs of RadA and RadB recombinase,  
505 Mre11, Rad50, the HerA-NurA helicase/nuclease pair, and Holliday junction resolvase Hjc  
506 are encoded in the genome. These genes have been shown to be essential in other archaeal  
507 (hyper)thermophiles, leading to hypotheses regarding their putative role in replication and  
508 more generally the tight integration of repair, recombination and replication processes in  
509 (hyper)thermophilic archaea (Grogan, 2015).

510 b) Base excision repair (BER): the machinery responsible for the repair of deaminated bases  
511 was identified in the genome, including uracil DNA glycosylases (UDG) and putative  
512 apurinic/aprimidinic lyases. Deletion of UDGs was shown to impair growth of  
513 (hyper)thermophilic archaea (Grogan, 2015).

514 c) Nucleotide excision repair (NER): Homologs of the putative DNA repair helicase:  
515 nuclease pair XPB-Bax1 and nuclease XPF were found in the genome, but repair nuclease  
516 XPD could not be identified. XPD is present in all so far analyzed mesophilic AOA, but it is  
517 also absent in other thermophiles (Kelman and White, 2005). It should be noted that NER  
518 functionality in archaea is still unclear, and deletions of the respective genes were shown to  
519 have no observable phenotype (Grogan, 2015).

520 d) Translesion polymerase: A Y-family polymerase with low-fidelity able to perform  
521 translesion DNA synthesis is encoded in *Ca. N. cavascurensis*.

522 Key enzymes of all the above-mentioned systems are also found in mesophilic AOA. Given  
523 their extensive study in the crenarchaeal (hyper)thermophiles, it would be interesting to  
524 characterize their respective functions and regulation in both mesophilic and thermophilic  
525 Thaumarchaeota.

526 e) Bacterial-type UvrABC excision repair: In contrast to mesophilic AOA and in agreement  
527 with the known distribution of the system among mesophilic archaea and bacteria but its  
528 absence in (hyper)thermophiles, *Ca. N. cavascurensis* does not encode homologs of this  
529 repair machinery.

530  
531 *Ca. N. cavascurensis* could potentially produce the polyamines putrescine and spermidine,  
532 which have been shown to bind and stabilize compacted DNA from thermal denaturation,  
533 acting synergistically with histone molecules, also present in AOA (Higashibata et al.,  
534 2000;Oshima, 2007). Although a putative spermidine synthase is also found in mesophilic  
535 AOA, the gene encoding for the previous step, S-adenosylmethionine decarboxylase  
536 (NCAV\_0959), is only found in *Ca. N. cavascurensis*, located in tandem with the former. The  
537 biosynthesis of putrescine (a substrate for spermidine synthase) is unclear, since we could not  
538 identify a pyruvoyl-dependent arginine decarboxylase (ADC, catalyzing the first of the two-  
539 step biosynthesis of putrescine). However, it was shown that the crenarchaeal arginine  
540 decarboxylase evolved from an S-adenosylmethionine decarboxylase enzyme, raising the  
541 possibility of a promiscuous enzyme (Giles and Graham, 2008).

542



543 The production of thermoprotectant compounds with a role in stabilizing proteins from heat  
544 denaturation seems to be a preferred strategy of heat adaptation in *Ca. N. cavascurensis*.  
545 Firstly, the presence of mannosyl-3-phosphoglycerate synthase (NCAV\_1295) indicates the  
546 ability to synthesize this compatible solute, shown to be involved in heat stress response and  
547 protect proteins from heat denaturation in Thermococcales (Neves et al., 2005). Homologous  
548 genes are also present in mesophilic members of the order Nitrososphaerales and other  
549 (hyper)thermophiles (Spang et al., 2012; Kerou et al., 2016). Secondly, only *Ca. N.*  
550 *cavascurensis*, but no other AOA encodes a cyclic 2, 3-diphosphoglycerate (cDPG)  
551 synthetase (NCAV\_0908), an ATP-dependent enzyme which can synthesize cDPG from 2,3-  
552 biphosphoglycerate, an intermediate in gluconeogenesis. High intracellular concentrations of  
553 cDPG accumulate in hyperthermophilic methanogens, where it is required for the activity and  
554 thermostability of important metabolic enzymes (Shima et al., 1998).

555  
556 *Notable features of the DNA replication and cell division systems in Ca. N. cavascurensis*  
557 Strikingly, only one family B replicative polymerase PolB was identified in the genome of  
558 *Ca. N. cavascurensis* (NCAV\_1300), making it the only archaeon known so far to encode a  
559 single subunit of the replicative family B polymerase, as in Crenarchaeota multiple paralogs  
560 with distinct functions coexist (Makarova et al., 2014). Both subunits of the D-family  
561 polymerases PolD present in all other AOA and shown to be responsible for DNA replication  
562 in *T. kodakarensis* (also encoding both polD and polB families) (Cubonova et al., 2013) were  
563 absent from the genome, raising intriguing questions about the role of the polB family  
564 homolog in mesophilic Thaumarchaeota. Sequence analysis indicated that the *Ca. N.*  
565 *cavascurensis* homolog belongs to the polB1 group present exclusively in the TACK  
566 superphylum and shown recently by Yan and colleagues to be responsible for both leading  
567 and lagging strand synthesis in the crenarchaeon *Sulfolobus solfataricus* (Yan et al., 2017).  
568 However, the activity of *Sulfolobus solfataricus* PolB1 is determined based on the presence  
569 and binding of two additional proteins, PBP1 and PBP2, mitigating the strand-displacement  
570 activity during lagging strand synthesis and enhancing DNA synthesis and thermal stability  
571 of the holoenzyme, respectively. No homologs of these two additional subunits were  
572 identified in *Ca. N. cavascurensis*, raising the question of enzymatic thermal stability and  
573 efficiency of DNA synthesis on both strands.

574  
575 Homologs of genes for the Cdv cell division system proteins CdvB (3 paralogues) and CdvC,  
576 but not CdvA, were identified in *Ca. N. cavascurensis*. This is surprising given that all three  
577 proteins were detected by specific immuno-labelling in the mesophilic AOA *N. maritimus*,  
578 where CdvA, CdvC and two CdvB paralogues were shown to localize mid-cell in cells with  
579 segregated nucleoids, indicating that this system mediates cell division in thaumarchaeota  
580 (Pelve et al., 2011). The *Ca. N. cavascurensis* CdvB paralogues (as all other thaumarchaeal  
581 CdvBs) all share the core ESCRT-III with the crenarchaeal CdvB sequences, contain a  
582 putative (but rather unconvincing) MIM2 motif necessary for interacting with CdvC in  
583 Crenarchaeota, while they all lack the C-terminal winged-helix domain responsible for  
584 interacting with CdvA (Samson et al., 2011; Ng et al., 2013). Interestingly, one of the *Ca. N.*  
585 *cavascurensis* paralogs (NCAV\_0805) possesses a 40 amino-acids serine-rich C-terminal  
586 extension right after the putative MIM2 motif absent from other thaumarchaea. It is worth  
587 noting that CdvA is also absent from the published Aigarchaeota genomes *Ca.*  
588 *Caldiarchaeum subterraneum* (Nunoura et al., 2011) and *Ca. Calditenuis aerorheumensis*  
589 (Beam et al., 2016), while both phyla (Thaumarchaeota and Aigarchaeota) encode an atypical  
590 FtsZ homolog. Thermococcales, albeit they presumably divide with the FtsZ system, also

591 encode CdvB and CdvC homologs, while no CdvA homolog is detectable (Makarova et al.,  
592 2010). Given the emerging differences in the molecular and regulatory aspects of the Cdv  
593 system between Crenarchaeota and Thaumarchaeota (Pelve et al., 2011;Ng et al., 2013), the  
594 intriguing additional roles of the system (Samson et al., 2017) and the fact that only CdvB  
595 and CdvC are homologous to the eukaryotic ESCRT-III system and therefore seem to have  
596 fixed roles in evolutionary terms, this observation raises interesting questions regarding the  
597 versatility of different players of the cell division apparatus.  
598

#### 599 *Ca. N. cavascurensis* has a dynamic genome

600 The *Ca. N. cavascurensis* genome contains large clusters of genes that showed deviations  
601 from the average G+C content of the genome (*i.e.*, 41.6%), indicating that these regions  
602 might have been acquired by lateral gene transfer (Fig. 7).

603 Two of the larger regions were integrative and conjugative elements (ICE-1 and ICE-2 in  
604 Figures 7 and 8) of 65.5 kb and 43.6 kb, respectively. Both are integrated into tRNA genes  
605 and flanked by characteristic 21 bp and 24 bp-long direct repeats corresponding to the  
606 attachment sites, a typical sequence feature generated upon site-specific recombination  
607 between the cellular chromosome and a mobile genetic element (Grindley et al., 2006). ICE-1  
608 and ICE-2 encode major proteins required for conjugation (colored in red in Fig. 8A),  
609 including VirD4-like and VirB4-like ATPases, VirB6-like transfer protein and VirB2-like  
610 pilus protein (in ICE-2). The two elements also share homologs of CopG-like proteins  
611 containing the ribbon-helix-helix DNA-binding motifs and beta-propeller-fold sialidases (the  
612 latter appears to be truncated in ICE-1). The sialidases of ICE-1 and ICE-2 are most closely  
613 related to each other (37% identity over 273 aa alignment). It is not excluded that ICE-1 and  
614 ICE-2 have inherited the conjugation machinery as well as the genes for the sialidase and the  
615 CopG-like protein from a common ancestor, but have subsequently diversified by accreting  
616 functionally diverse gene complements. Indeed, most of the genes carried by ICE-1 and ICE-  
617 2 are unrelated. ICE-1, besides encoding the conjugation proteins, carries many genes for  
618 proteins involved in DNA metabolism, including an archaeo-eukaryotic primase-superfamily  
619 3 helicase fusion protein, Cdc6-like ATPase, various nucleases (HEPN, PD-(D/E)XK, PIN),  
620 DNA methyltransferases, diverse DNA-binding proteins and an integrase of the tyrosine  
621 recombinase superfamily (yellow in Fig. 8A). The conservation of the attachment sites and  
622 the integrase gene as well as of the conjugative genes indicates that this element is likely to  
623 be a still-active Integrative and Conjugative Element (ICE) able to integrate the chromosome  
624 and excise from it as a conjugative plasmid.

625 ICE-2 is shorter and encodes a distinct set of DNA metabolism proteins, including  
626 topoisomerase IA, superfamily 1 helicase, ParB-like partitioning protein, GIY-YIG and  
627 FLAP nucleases as well as several DNA-binding proteins. More importantly, this element  
628 also encodes a range of proteins involved in various metabolic activities as well as a  
629 Co/Zn/Cd efflux system that might provide relevant functions to the host (green in Fig. 8A).  
630 In bacteria, ICE elements often contain cargo genes that are not related to the ICE life cycle  
631 and that confer novel phenotypes to host cells (Johnson and Grossman, 2015). It is possible  
632 that under certain conditions, genes carried by ICE-1 and ICE-2, and in particular the  
633 metabolic genes of ICE-2, improve the fitness of *Ca. N. cavascurensis*. Notably, only ICE-1  
634 encodes an integrase, whereas ICE-2 does not, suggesting that ICE-2 is an immobilized  
635 conjugative element that can be vertically inherited in AOA. Given that the attachment sites  
636 of the two elements do not share significant sequence similarity, the possibility that ICE-2 is  
637 mobilized *in trans* by the integrase of ICE-1 appears unlikely.

638

639 The third mobile genetic element is derived from a virus, related to members of the viral  
640 order Caudovirales (Fig. 8B) (Prangishvili et al., 2017). It encodes several signature proteins  
641 of this virus group, most notably the large subunit of the terminase, the portal protein and the  
642 HK97-like major capsid protein (and several other viral homologs). All these proteins with  
643 homologs in viruses are involved in virion assembly and morphogenesis. However, no  
644 proteins involved in genome replication seem to be present. The element does not contain an  
645 integrase gene, nor is it flanked by attachment sites, which indicates that it is immobilized.  
646 Interestingly, a similar observation has been made with the potential provirus-derived  
647 element in *N. viennensis* (Krupovic et al., 2011). Given that the morphogenesis genes of the  
648 virus appear to be intact, one could speculate that these elements represent domesticated  
649 viruses akin to gene transfer agents, as observed in certain methanogenic euryarchaea  
650 (Eiserling et al., 1999;Krupovic et al., 2010), or killer particles (Bobay et al., 2014), rather  
651 than deteriorating proviruses. Notably, ICE-1, ICE-2 and the provirus-derived element all  
652 encode divergent homologs of TFIIB, a transcription factor that could alter the promoter  
653 specificity to the RNA polymerase.

654

655 A fourth set of unique, potentially transferred genes encodes a putative pilus (Fig. 8C). All  
656 genes required for the assembly of a type IV pilus (T4P) are present, including an ATPase  
657 and an ATPase binding protein, a membrane platform protein, a prepilin peptidase, and  
658 several prepilins (Makarova et al., 2016). Based on the arCOG family of the broadly  
659 conserved ATPase, ATPase-binding protein, membrane-platform protein, and prepilin  
660 peptidase (arCOG001817, -4148, -1808, and -2298), this pilus seems unique in family  
661 composition, but more similar to the archetypes of pili defined as clades 4 (A, H, I, J) by  
662 Makarova and colleagues, which are mostly found in Sulfolobales and Desulfurococcales  
663 (Fig. 4 from (Makarova et al., 2016)). Yet, the genes associated to this putative pilus seem to  
664 be more numerous, as the locus consists of approximately 16 genes (versus ~5 genes for the  
665 aap and ups in *Sulfolobus*). Such a combination of families is not found either in the T4P or  
666 flagellar loci found in analysed Thaumarchaeota genomes. Prepilins are part of the core  
667 machinery of T4P, but display a high level of sequence diversity. The three prepilins found in  
668 *Ca. N. cavascurensis* T4P locus correspond to families that are not found in any other  
669 genomes from our dataset (arCOG003872, -5987, -7276). We found a putative adhesin right  
670 in between the genes encoding the prepilins, and therefore propose that this *Ca. N.*  
671 *cavascurensis*-specific type IV pilus is involved in adhesion (Fig. 8C). This pilus thus appears  
672 to be unique in protein families composition when compared to experimentally validated T4P  
673 homologs in archaea (flagellum, ups, aap, bindosome (Szabo et al., 2007;Zolghadr et al.,  
674 2007;Frols et al., 2008;Tripepi et al., 2010;Henche et al., 2012)), bioinformatically predicted  
675 ones (Makarova et al., 2016), and the pili found in other Thaumarchaeota, which correspond  
676 to different types. Interestingly, this pilus gene cluster lies directly next to a conserved  
677 chemotaxis/archaeallum cluster as the one found in *N. gargensis* or *N. limnia* (four predicted  
678 genes separate the T4P genes and *cheA*, Fig. 8C) (Spang et al., 2012). This suggests that this  
679 pilus might be controlled by exterior stimuli through chemotaxis. The interplay between the  
680 archaeallum and pilus expression would be interesting to study in order to comprehend their  
681 respective roles.

682

683 The genome of *Ca. N. cavascurensis* also carries traces of inactivated integrase genes as well  
684 as transposons related to bacterial and archaeal IS elements, suggesting that several other  
685 types of mobile genetic elements have been colonizing the genome of *Ca. N. cavascurensis*.

686 Collectively, these observations illuminate the flexibility of the *Ca. N. cavascurens* genome,  
687 prone to lateral gene transfer and invasion by alien elements. Accordingly, we found a  
688 CRISPR-Cas adaptive immunity system among the sets of genes specific to *Ca. N.*  
689 *cavascurens* that we could assign to the subtype I-B (Abby et al., 2014). We detected using  
690 the CRISPRFinder website (Grissa et al., 2007) at least three CRISPR arrays containing  
691 between 4 and 101 spacers presumably targeting mobile genetic elements associated with *Ca.*  
692 *N. cavascurens*, reinforcing the idea of a very dynamic genome. Interestingly, the second  
693 biggest CRISPR array (96 spacers) lies within the integrated conjugative element ICE-1,  
694 which we hypothesize to be still active. This suggests that ICE-1 may serve as a vehicle for  
695 the horizontal transfer of the CRISPR spacers between *Ca. N. cavascurens* and other  
696 organisms present in the same environment through conjugation, thus spreading the acquired  
697 immunity conferred by these spacers against common enemies.

698

### 699 **Conclusions**

700 We present an obligately thermophilic ammonia oxidizing archaeon from a hot spring in the  
701 Italian island of Ischia that is related to, but also clearly distinct from *Ca. Nitrosocaldus*  
702 *yellowstonii*. It contains most of the genes that have been found to be conserved among AOA  
703 and are implicated in energy and central carbon metabolism, except *nirK* encoding a nitrite  
704 reductase. Its genome gives indications for alternative energy metabolism and exhibits  
705 adaptations to the extreme environment. However, it lacks an identifiable reverse gyrase,  
706 which is found in most thermophiles with optimal growth temperatures above 65°C and  
707 apparently harbors a provirus of head-and-tail structure that is usually not found at high  
708 temperature. *Ca. N. cavascurens* differs also in its gene sets for replication and cell division,  
709 which has implications for function and evolution of these systems in archaea. In addition, its  
710 extensive mobilome and the defense system indicate that thermophilic AOA are in constant  
711 exchange with the environment and with neighboring organisms as discussed for other  
712 thermophiles (van Wolferen et al., 2013). This might have shaped and continues in shaping  
713 the evolution of thaumarchaeota in hot springs. The pivotal phylogenetic position of *Ca. N.*  
714 *cavascurens* will allow reconstructing the last common ancestor of AOA and provide  
715 further insights into the evolution of this ecologically widespread group of archaea.

716 For our enriched strain we propose a candidate status with the following taxonomic  
717 assignment:

718 Nitrosocaldales order

719 Nitrosocaldaceae fam. and

720 Candidatus *Nitrosocaldus cavascurens* sp. nov.

721 Etymology: L. adj. nitrosus, “full of natron,” here intended to

722 mean nitrous (nitrite producer); L. masc.n. caldus, hot;

723 *cavascurens* (L.masc. gen) describes origin of sample (terme di cavascura, Ischia)

724 Locality: hot mud, outflow from hot underground spring, 78 °C

725 Diagnosis: an ammonia oxidizing archaeon growing optimally around 68 °C at neutral pH  
726 under chemolithoautotrophic conditions with ammonia or urea,

727 spherically shaped with a diameter of approximately 0.6 to 0.8 μm, 4% sequence divergence

728 in 16S rRNA gene from its next cultivated relative *Ca. Nitrosocaldus yellowstonii*.

729

730 **Authors contribution**

731 CS conceived the study, MS did first enrichments, MM and CR made growth  
732 characterizations, KP did electron microscopy, SSA assembled genome and performed  
733 phylogenetic and genomic analyses for annotation, MKe annotated all metabolic and  
734 information processing genes, MKr analysed mobile genetic elements; CS, SSA, MKe wrote  
735 manuscript with contributions from MKr and MM.

736

737 **Conflict of Interest**

738 The authors declare that the research was conducted in the absence of any commercial or  
739 financial relationships that could be construed as a potential conflict of interest.

740

741 **Acknowledgments**

742 We are grateful to Lucia Monti for sharing her geological knowledge and for guiding us to  
743 the hot springs on Ischia in spring and fall 2013 and to Silvia Bulgheresi for crucial help in  
744 organising the fall expedition. We also thank Romana Bittner for excellent technical  
745 assistance and continuous cultivation and the 12 participants of the Bachelor practical class  
746 (University of Vienna) for help in sampling hot springs on Ischia and for setting up initial  
747 enrichments. We are grateful to Thomas Rattei and Florian Goldenberg for help in running  
748 computations and for providing access to the CUBE servers in Vienna, Austria. Special  
749 thanks go to LABGeM, the National Infrastructure « France Genomique » and the  
750 MicroScope team of the Genoscope (Evry, France) for providing the pipeline of annotation,  
751 and for their help during this study. We thank Eduardo Rocha and Marie Touchon for kindly  
752 providing access to their curated genome database.

753

754 **Funding**

755 This project was supported by ERC Advanced Grant TACKLE (695192) and Doktoratskolleg  
756 W1257 of the Austrian Science fund (FWF). SSA was funded by a “Marie-Curie Action”  
757 fellowship, grant number THAUMECOPHYL 701981.

758

759

760

761



762 **References**

- 763 Abby, S.S., Neron, B., Menager, H., Touchon, M., and Rocha, E.P. (2014). MacSyFinder: a  
764 program to mine genomes for molecular systems with an application to CRISPR-Cas  
765 systems. *PLoS One* 9, e110726.
- 766 Adam, P.S., Borrel, G., Brochier-Armanet, C., and Gribaldo, S. (2017). The growing tree of  
767 Archaea: new perspectives on their diversity, evolution and ecology. *ISME J* 11,  
768 2407-2425.
- 769 Altschul, S.F., Madden, T.L., Schaffer, A.A., Zhang, J., Zhang, Z., Miller, W., and Lipman,  
770 D.J. (1997). Gapped BLAST and PSI-BLAST: a new generation of protein database  
771 search programs. *Nucleic Acids Res* 25, 3389-3402.
- 772 Alves, R.J., Wanek, W., Zappe, A., Richter, A., Svenning, M.M., Schleper, C., and Urich, T.  
773 (2013). Nitrification rates in Arctic soils are associated with functionally distinct  
774 populations of ammonia-oxidizing archaea. *ISME J* 7, 1620-1631.
- 775 Amann, R.L., Krumholz, L., and Stahl, D.A. (1990). Fluorescent-oligonucleotide probing of  
776 whole cells for determinative, phylogenetic, and environmental studies in  
777 microbiology. *J Bacteriol* 172, 762-770.
- 778 Atomi, H., Matsumi, R., and Imanaka, T. (2004). Reverse gyrase is not a prerequisite for  
779 hyperthermophilic life. *J Bacteriol* 186, 4829-4833.
- 780 Barns, S.M., Delwiche, C.F., Palmer, J.D., and Pace, N.R. (1996). Perspectives on archaeal  
781 diversity, thermophily and monophyly from environmental rRNA sequences. *Proc*  
782 *Natl Acad Sci U S A* 93, 9188-9193.
- 783 Bartossek, R., Nicol, G.W., Lanzen, A., Klenk, H.P., and Schleper, C. (2010). Homologues of  
784 nitrite reductases in ammonia-oxidizing archaea: diversity and genomic context.  
785 *Environ Microbiol* 12, 1075-1088.
- 786 Bayer, B., Vojvoda, J., Offre, P., Alves, R.J., Elisabeth, N.H., Garcia, J.A., Volland, J.M.,  
787 Srivastava, A., Schleper, C., and Herndl, G.J. (2016). Physiological and genomic  
788 characterization of two novel marine thaumarchaeal strains indicates niche  
789 differentiation. *ISME J* 10, 1051-1063.
- 790 Beam, J.P., Jay, Z.J., Kozubal, M.A., and Inskeep, W.P. (2014). Niche specialization of novel  
791 Thaumarchaeota to oxic and hypoxic acidic geothermal springs of Yellowstone  
792 National Park. *ISME J* 8, 938-951.
- 793 Beam, J.P., Jay, Z.J., Schmid, M.C., Rusch, D.B., Romine, M.F., Jennings Rde, M., Kozubal,  
794 M.A., Tringe, S.G., Wagner, M., and Inskeep, W.P. (2016). Ecophysiology of an  
795 uncultivated lineage of Aigarchaeota from an oxic, hot spring filamentous 'streamer'  
796 community. *ISME J* 10, 210-224.
- 797 Bobay, L.M., Touchon, M., and Rocha, E.P. (2014). Pervasive domestication of defective  
798 prophages by bacteria. *Proc Natl Acad Sci U S A* 111, 12127-12132.
- 799 Bouthier De La Tour, C., Portemer, C., Nadal, M., Stetter, K.O., Forterre, P., and Duguet, M.  
800 (1990). Reverse gyrase, a hallmark of the hyperthermophilic archaeobacteria. *J*  
801 *Bacteriol* 172, 6803-6808.
- 802 Brochier-Armanet, C., Boussau, B., Gribaldo, S., and Forterre, P. (2008). Mesophilic  
803 Crenarchaeota: proposal for a third archaeal phylum, the Thaumarchaeota. *Nat Rev*  
804 *Microbiol* 6, 245-252.
- 805 Brochier-Armanet, C., and Forterre, P. (2007). Widespread distribution of archaeal reverse  
806 gyrase in thermophilic bacteria suggests a complex history of vertical inheritance and  
807 lateral gene transfers. *Archaea* 2, 83-93.
- 808 Brochier-Armanet, C., Gribaldo, S., and Forterre, P. (2012). Spotlight on the  
809 Thaumarchaeota. *ISME J* 6, 227-230.

- 810 Caranto, J.D., and Lancaster, K.M. (2017). Nitric oxide is an obligate bacterial nitrification  
811 intermediate produced by hydroxylamine oxidoreductase. *Proc Natl Acad Sci U S A*  
812 114, 8217-8222.
- 813 Chevenet, F., Croce, O., Hebrard, M., Christen, R., and Berry, V. (2010). ScripTree: scripting  
814 phylogenetic graphics. *Bioinformatics* 26, 1125-1126.
- 815 Cole, J.K., Peacock, J.P., Dodsworth, J.A., Williams, A.J., Thompson, D.B., Dong, H., Wu,  
816 G., and Hedlund, B.P. (2013). Sediment microbial communities in Great Boiling  
817 Spring are controlled by temperature and distinct from water communities. *ISME J* 7,  
818 718-729.
- 819 Criscuolo, A., and Gribaldo, S. (2010). BMGE (Block Mapping and Gathering with Entropy):  
820 a new software for selection of phylogenetic informative regions from multiple  
821 sequence alignments. *BMC Evol Biol* 10, 210.
- 822 Cubonova, L., Richardson, T., Burkhart, B.W., Kelman, Z., Connolly, B.A., Reeve, J.N., and  
823 Santangelo, T.J. (2013). Archaeal DNA polymerase D but not DNA polymerase B is  
824 required for genome replication in *Thermococcus kodakarensis*. *J Bacteriol* 195,  
825 2322-2328.
- 826 De La Torre, J.R., Walker, C.B., Ingalls, A.E., Konneke, M., and Stahl, D.A. (2008).  
827 Cultivation of a thermophilic ammonia oxidizing archaeon synthesizing crenarchaeol.  
828 *Environmental Microbiology* 10, 810-818.
- 829 Dodsworth, J.A., Hungate, B.A., and Hedlund, B.P. (2011). Ammonia oxidation,  
830 denitrification and dissimilatory nitrate reduction to ammonium in two US Great  
831 Basin hot springs with abundant ammonia-oxidizing archaea. *Environ Microbiol* 13,  
832 2371-2386.
- 833 Eddy, S.R. (2011). Accelerated Profile HMM Searches. *PLoS Comput Biol* 7, e1002195.
- 834 Eiserling, F., Pushkin, A., Gingery, M., and Bertani, G. (1999). Bacteriophage-like particles  
835 associated with the gene transfer agent of *Methanococcus voltae* PS. *J Gen Virol* 80 (  
836 Pt 12), 3305-3308.
- 837 Eme, L., Reigstad, L.J., Spang, A., Lanzen, A., Weinmaier, T., Rattei, T., Schleper, C., and  
838 Brochier-Armanet, C. (2013). Metagenomics of Kamchatkan hot spring filaments  
839 reveal two new major (hyper)thermophilic lineages related to Thaumarchaeota. *Res*  
840 *Microbiol* 164, 425-438.
- 841 Erguder, T.H., Boon, N., Wittebolle, L., Marzorati, M., and Verstraete, W. (2009).  
842 Environmental factors shaping the ecological niches of ammonia-oxidizing archaea.  
843 *FEMS Microbiol Rev* 33, 855-869.
- 844 Evans, D.J., Jr., Evans, D.G., Engstrand, L., and Graham, D.Y. (1992). Urease-associated  
845 heat shock protein of *Helicobacter pylori*. *Infect Immun* 60, 2125-2127.
- 846 Finn, R.D., Bateman, A., Clements, J., Coghill, P., Eberhardt, R.Y., Eddy, S.R., Heger, A.,  
847 Hetherington, K., Holm, L., Mistry, J., Sonnhammer, E.L., Tate, J., and Punta, M.  
848 (2014). Pfam: the protein families database. *Nucleic Acids Res* 42, D222-230.
- 849 Forterre, P. (2002). A hot story from comparative genomics: reverse gyrase is the only  
850 hyperthermophile-specific protein. *Trends Genet* 18, 236-237.
- 851 Frols, S., Ajon, M., Wagner, M., Teichmann, D., Zolghadr, B., Folea, M., Boekema, E.J.,  
852 Driessen, A.J., Schleper, C., and Albers, S.V. (2008). UV-inducible cellular  
853 aggregation of the hyperthermophilic archaeon *Sulfolobus solfataricus* is mediated by  
854 pili formation. *Mol Microbiol* 70, 938-952.
- 855 Giles, T.N., and Graham, D.E. (2008). Crenarchaeal arginine decarboxylase evolved from an  
856 S-adenosylmethionine decarboxylase enzyme. *J Biol Chem* 283, 25829-25838.

- 857 Gough, J., Karplus, K., Hughey, R., and Chothia, C. (2001). Assignment of homology to  
858 genome sequences using a library of hidden Markov models that represent all proteins  
859 of known structure. *J Mol Biol* 313, 903-919.
- 860 Grasso, S., and Tell, G. (2014). Base excision repair in Archaea: back to the future in DNA  
861 repair. *DNA Repair (Amst)* 21, 148-157.
- 862 Greening, C., Biswas, A., Carere, C.R., Jackson, C.J., Taylor, M.C., Stott, M.B., Cook, G.M.,  
863 and Morales, S.E. (2016). Genomic and metagenomic surveys of hydrogenase  
864 distribution indicate H<sub>2</sub> is a widely utilised energy source for microbial growth and  
865 survival. *ISME J* 10, 761-777.
- 866 Gribaldo, S., and Brochier-Armanet, C. (2006). The origin and evolution of Archaea: a state  
867 of the art. *Philos Trans R Soc Lond B Biol Sci* 361, 1007-1022.
- 868 Griffiths, R.I., Whiteley, A.S., O'donnell, A.G., and Bailey, M.J. (2000). Rapid method for  
869 coextraction of DNA and RNA from natural environments for analysis of ribosomal  
870 DNA- and rRNA-based microbial community composition. *Appl Environ Microbiol*  
871 66, 5488-5491.
- 872 Grindley, N.D., Whiteson, K.L., and Rice, P.A. (2006). Mechanisms of site-specific  
873 recombination. *Annu Rev Biochem* 75, 567-605.
- 874 Grissa, I., Vergnaud, G., and Pourcel, C. (2007). CRISPRFinder: a web tool to identify  
875 clustered regularly interspaced short palindromic repeats. *Nucleic Acids Res* 35, W52-  
876 57.
- 877 Grogan, D.W. (2015). Understanding DNA Repair in Hyperthermophilic Archaea: Persistent  
878 Gaps and Other Reasons to Focus on the Fork. *Archaea* 2015, 942605.
- 879 Groussin, M., and Gouy, M. (2011). Adaptation to environmental temperature is a major  
880 determinant of molecular evolutionary rates in archaea. *Mol Biol Evol* 28, 2661-2674.
- 881 Haft, D.H., Selengut, J.D., and White, O. (2003). The TIGRFAMs database of protein  
882 families. *Nucleic Acids Res* 31, 371-373.
- 883 Hallam, S.J., Mincer, T.J., Schleper, C., Preston, C.M., Roberts, K., Richardson, P.M., and  
884 Delong, E.F. (2006). Pathways of carbon assimilation and ammonia oxidation  
885 suggested by environmental genomic analyses of marine Crenarchaeota. *PLoS Biol* 4,  
886 e95.
- 887 Hatzenpichler, R. (2012). Diversity, physiology, and niche differentiation of ammonia-  
888 oxidizing archaea. *Appl Environ Microbiol* 78, 7501-7510.
- 889 Henche, A.L., Ghosh, A., Yu, X., Jeske, T., Egelman, E., and Albers, S.V. (2012). Structure  
890 and function of the adhesive type IV pilus of *Sulfolobus acidocaldarius*. *Environ*  
891 *Microbiol* 14, 3188-3202.
- 892 Higashibata, H., Fujiwara, S., Ezaki, S., Takagi, M., Fukui, K., and Imanaka, T. (2000).  
893 Effect of polyamines on histone-induced DNA compaction of hyperthermophilic  
894 archaea. *J Biosci Bioeng* 89, 103-106.
- 895 Ishino, Y., and Narumi, I. (2015). DNA repair in hyperthermophilic and hyperradioresistant  
896 microorganisms. *Curr Opin Microbiol* 25, 103-112.
- 897 Jackson, C.R., Langner, H.W., Donahoe-Christiansen, J., Inskeep, W.P., and Mcdermott, T.R.  
898 (2001). Molecular analysis of microbial community structure in an arsenite-oxidizing  
899 acidic thermal spring. *Environ Microbiol* 3, 532-542.
- 900 Jiang, H., Huang, Q., Dong, H., Wang, P., Wang, F., Li, W., and Zhang, C. (2010). RNA-  
901 based investigation of ammonia-oxidizing archaea in hot springs of Yunnan Province,  
902 China. *Appl Environ Microbiol* 76, 4538-4541.
- 903 Johnson, C.M., and Grossman, A.D. (2015). Integrative and Conjugative Elements (ICEs):  
904 What They Do and How They Work. *Annu Rev Genet* 49, 577-601.

- 905 Kanai, T., Matsuoka, R., Beppu, H., Nakajima, A., Okada, Y., Atomi, H., and Imanaka, T.  
906 (2011). Distinct physiological roles of the three [NiFe]-hydrogenase orthologs in the  
907 hyperthermophilic archaeon *Thermococcus kodakarensis*. *J Bacteriol* 193, 3109-3116.
- 908 Katoh, K., and Standley, D.M. (2014). MAFFT: iterative refinement and additional methods.  
909 *Methods Mol Biol* 1079, 131-146.
- 910 Kazlauskas, D., Sezonov, G., Charpin, N., Venclovas, C., Forterre, P., and Krupovic, M.  
911 (2017). Novel Families of Archaeo-Eukaryotic Primases Associated with Mobile  
912 Genetic Elements of Bacteria and Archaea. *J Mol Biol*.
- 913 Kelman, Z., and White, M.F. (2005). Archaeal DNA replication and repair. *Curr Opin*  
914 *Microbiol* 8, 669-676.
- 915 Kerou, M., Eloy Alves, R. J. And Schleper, C. (2016). "Nitrososphaeria," in *Bergey's Manual*  
916 *of Systematics of Archaea and Bacteria.*, ed. B.S.M. Trust.: John Wiley & Sons, Inc.),  
917 1-8.
- 918 Kerou, M., Offre, P., Valledor, L., Abby, S.S., Melcher, M., Nagler, M., Weckwerth, W., and  
919 Schleper, C. (2016). Proteomics and comparative genomics of *Nitrososphaera*  
920 *viennensis* reveal the core genome and adaptations of archaeal ammonia oxidizers.  
921 *Proc Natl Acad Sci U S A* 113, E7937-E7946.
- 922 Kim, J.G., Park, S.J., Sinninghe Damste, J.S., Schouten, S., Rijpstra, W.I., Jung, M.Y., Kim,  
923 S.J., Gwak, J.H., Hong, H., Si, O.J., Lee, S., Madsen, E.L., and Rhee, S.K. (2016).  
924 Hydrogen peroxide detoxification is a key mechanism for growth of ammonia-  
925 oxidizing archaea. *Proc Natl Acad Sci U S A* 113, 7888-7893.
- 926 Konneke, M., Bernhard, A.E., De La Torre, J.R., Walker, C.B., Waterbury, J.B., and Stahl,  
927 D.A. (2005). Isolation of an autotrophic ammonia-oxidizing marine archaeon. *Nature*  
928 437, 543-546.
- 929 Konneke, M., Schubert, D.M., Brown, P.C., Hugler, M., Standfest, S., Schwander, T., Schada  
930 Von Borzyskowski, L., Erb, T.J., Stahl, D.A., and Berg, I.A. (2014). Ammonia-  
931 oxidizing archaea use the most energy-efficient aerobic pathway for CO<sub>2</sub> fixation.  
932 *Proc Natl Acad Sci U S A* 111, 8239-8244.
- 933 Koren, S., Walenz, B.P., Berlin, K., Miller, J.R., Bergman, N.H., and Phillippy, A.M. (2017).  
934 Canu: scalable and accurate long-read assembly via adaptive k-mer weighting and  
935 repeat separation. *Genome Research*.
- 936 Kozlowski, J.A., Kits, K.D., and Stein, L.Y. (2016a). Comparison of Nitrogen Oxide  
937 Metabolism among Diverse Ammonia-Oxidizing Bacteria. *Front Microbiol* 7, 1090.
- 938 Kozlowski, J.A., Stieglmeier, M., Schleper, C., Klotz, M.G., and Stein, L.Y. (2016b).  
939 Pathways and key intermediates required for obligate aerobic ammonia-dependent  
940 chemolithotrophy in bacteria and Thaumarchaeota. *ISME J* 10, 1836-1845.
- 941 Krupovic, M., Forterre, P., and Bamford, D.H. (2010). Comparative analysis of the mosaic  
942 genomes of tailed archaeal viruses and proviruses suggests common themes for virion  
943 architecture and assembly with tailed viruses of bacteria. *J Mol Biol* 397, 144-160.
- 944 Krupovic, M., Spang, A., Gribaldo, S., Forterre, P., and Schleper, C. (2011). A thaumarchaeal  
945 provirus testifies for an ancient association of tailed viruses with archaea. *Biochem*  
946 *Soc Trans* 39, 82-88.
- 947 Kurtz, S., Phillippy, A., Delcher, A.L., Smoot, M., Shumway, M., Antonescu, C., and  
948 Salzberg, S.L. (2004). Versatile and open software for comparing large genomes.  
949 *Genome Biology* 5, R12.
- 950 Li, H., Yang, Q., Li, J., Gao, H., Li, P., and Zhou, H. (2015). The impact of temperature on  
951 microbial diversity and AOA activity in the Tengchong Geothermal Field, China. *Sci*  
952 *Rep* 5, 17056.



- 953 Lin, X., Handley, K.M., Gilbert, J.A., and Kostka, J.E. (2015). Metabolic potential of fatty  
954 acid oxidation and anaerobic respiration by abundant members of Thaumarchaeota  
955 and Thermoplasmata in deep anoxic peat. *ISME J* 9, 2740-2744.
- 956 Lopez-Garcia, P., Brochier, C., Moreira, D., and Rodriguez-Valera, F. (2004). Comparative  
957 analysis of a genome fragment of an uncultivated mesopelagic crenarchaeote reveals  
958 multiple horizontal gene transfers. *Environ Microbiol* 6, 19-34.
- 959 Luo, H., Zhang, C.T., and Gao, F. (2014). Ori-Finder 2, an integrated tool to predict  
960 replication origins in the archaeal genomes. *Front Microbiol* 5, 482.
- 961 Makarova, K.S., Koonin, E.V., and Albers, S.V. (2016). Diversity and Evolution of Type IV  
962 pili Systems in Archaea. *Front Microbiol* 7, 667.
- 963 Makarova, K.S., Krupovic, M., and Koonin, E.V. (2014). Evolution of replicative DNA  
964 polymerases in archaea and their contributions to the eukaryotic replication  
965 machinery. *Front Microbiol* 5, 354.
- 966 Makarova, K.S., Wolf, Y.I., and Koonin, E.V. (2015). Archaeal Clusters of Orthologous  
967 Genes (arCOGs): An Update and Application for Analysis of Shared Features  
968 between Thermococcales, Methanococcales, and Methanobacteriales. *Life* 5, 818-840.
- 969 Makarova, K.S., Yutin, N., Bell, S.D., and Koonin, E.V. (2010). Evolution of diverse cell  
970 division and vesicle formation systems in Archaea. *Nat Rev Microbiol* 8, 731-741.
- 971 Martens-Habbena, W., Qin, W., Horak, R.E., Urakawa, H., Schauer, A.J., Moffett, J.W.,  
972 Armbrust, E.V., Ingalls, A.E., Devol, A.H., and Stahl, D.A. (2015). The production of  
973 nitric oxide by marine ammonia-oxidizing archaea and inhibition of archaeal  
974 ammonia oxidation by a nitric oxide scavenger. *Environ Microbiol* 17, 2261-2274.
- 975 Medigue, C., Calteau, A., Cruveiller, S., Gachet, M., Gautreau, G., Josso, A., Lajus, A.,  
976 Langlois, J., Pereira, H., Planel, R., Roche, D., Rollin, J., Rouy, Z., and Vallenet, D.  
977 (2017). MicroScope-an integrated resource for community expertise of gene functions  
978 and comparative analysis of microbial genomic and metabolic data. *Brief Bioinform.*
- 979 Miele, V., Penel, S., Daubin, V., Picard, F., Kahn, D., and Duret, L. (2012). High-quality  
980 sequence clustering guided by network topology and multiple alignment likelihood.  
981 *Bioinformatics* 28, 1078-1085.
- 982 Miele, V., Penel, S., and Duret, L. (2011). Ultra-fast sequence clustering from similarity  
983 networks with SiLiX. *BMC Bioinformatics* 12, 116.
- 984 Mussmann, M., Brito, I., Pitcher, A., Sinninghe Damste, J.S., Hatzenpichler, R., Richter, A.,  
985 Nielsen, J.L., Nielsen, P.H., Muller, A., Daims, H., Wagner, M., and Head, I.M.  
986 (2011). Thaumarchaeotes abundant in refinery nitrifying sludges express amoA but  
987 are not obligate autotrophic ammonia oxidizers. *Proc Natl Acad Sci U S A* 108,  
988 16771-16776.
- 989 Muyzer, G., De Waal, E.C., and Uitterlinden, A.G. (1993). Profiling of complex microbial  
990 populations by denaturing gradient gel electrophoresis analysis of polymerase chain  
991 reaction-amplified genes coding for 16S rRNA. *Appl Environ Microbiol* 59, 695-700.
- 992 Neves, C., Da Costa, M.S., and Santos, H. (2005). Compatible solutes of the  
993 hyperthermophile *Palaeococcus ferrophilus*: osmoadaptation and thermoadaptation in  
994 the order thermococcales. *Appl Environ Microbiol* 71, 8091-8098.
- 995 Ng, K.H., Srinivas, V., Srinivasan, R., and Balasubramanian, M. (2013). The Nitrosopumilus  
996 maritimus CdvB, but not FtsZ, assembles into polymers. *Archaea* 2013, 104147.
- 997 Nguyen, L.T., Schmidt, H.A., Von Haeseler, A., and Minh, B.Q. (2015). IQ-TREE: a fast and  
998 effective stochastic algorithm for estimating maximum-likelihood phylogenies. *Mol*  
999 *Biol Evol* 32, 268-274.



- 1000 Nicol, G.W., Leininger, S., Schleper, C., and Prosser, J.I. (2008). The influence of soil pH on  
1001 the diversity, abundance and transcriptional activity of ammonia oxidizing archaea  
1002 and bacteria. *Environ Microbiol* 10, 2966-2978.
- 1003 Nicol, G.W., and Schleper, C. (2006). Ammonia-oxidising Crenarchaeota: important players  
1004 in the nitrogen cycle? *Trends Microbiol* 14, 207-212.
- 1005 Nishizawa, M., Sakai, S., Konno, U., Nakahara, N., Takaki, Y., Saito, Y., Imachi, H.,  
1006 Tasumi, E., Makabe, A., Koba, K., and Takai, K. (2016). Nitrogen and Oxygen  
1007 Isotope Effects of Ammonia Oxidation by Thermophilic Thaumarchaeota from a  
1008 Geothermal Water Stream. *Appl Environ Microbiol* 82, 4492-4504.
- 1009 Nunoura, T., Hirayama, H., Takami, H., Oida, H., Nishi, S., Shimamura, S., Suzuki, Y.,  
1010 Inagaki, F., Takai, K., Nealson, K.H., and Horikoshi, K. (2005). Genetic and  
1011 functional properties of uncultivated thermophilic crenarchaeotes from a subsurface  
1012 gold mine as revealed by analysis of genome fragments. *Environ Microbiol* 7, 1967-  
1013 1984.
- 1014 Nunoura, T., Takaki, Y., Kakuta, J., Nishi, S., Sugahara, J., Kazama, H., Chee, G.J., Hattori,  
1015 M., Kanai, A., Atomi, H., Takai, K., and Takami, H. (2011). Insights into the  
1016 evolution of Archaea and eukaryotic protein modifier systems revealed by the genome  
1017 of a novel archaeal group. *Nucleic Acids Res* 39, 3204-3223.
- 1018 Offre, P., Kerou, M., Spang, A., and Schleper, C. (2014). Variability of the transporter gene  
1019 complement in ammonia-oxidizing archaea. *Trends Microbiol* 22, 665-675.
- 1020 Offre, P., Spang, A., and Schleper, C. (2013). Archaea in biogeochemical cycles. *Annu Rev*  
1021 *Microbiol* 67, 437-457.
- 1022 Okonechnikov, K., Golosova, O., Fursov, M., and Team, U. (2012). Unipro UGENE: a  
1023 unified bioinformatics toolkit. *Bioinformatics* 28, 1166-1167.
- 1024 Oshima, T. (2007). Unique polyamines produced by an extreme thermophile, *Thermus*  
1025 *thermophilus*. *Amino Acids* 33, 367-372.
- 1026 Otte, J., Mall, A., Schubert, D.M., Konneke, M., and Berg, I.A. (2015). Malonic  
1027 semialdehyde reductase from the archaeon *Nitrosopumilus maritimus* is involved in  
1028 the autotrophic 3-hydroxypropionate/4-hydroxybutyrate cycle. *Appl Environ*  
1029 *Microbiol* 81, 1700-1707.
- 1030 Ovreas, L., Forney, L., Daae, F.L., and Torsvik, V. (1997). Distribution of bacterioplankton  
1031 in meromictic Lake Saelenvannet, as determined by denaturing gradient gel  
1032 electrophoresis of PCR-amplified gene fragments coding for 16S rRNA. *Appl Environ*  
1033 *Microbiol* 63, 3367-3373.
- 1034 Park, S.J., Kim, J.G., Jung, M.Y., Kim, S.J., Cha, I.T., Ghai, R., Martin-Cuadrado, A.B.,  
1035 Rodriguez-Valera, F., and Rhee, S.K. (2012). Draft genome sequence of an ammonia-  
1036 oxidizing archaeon, "Candidatus *Nitrosopumilus sediminis*" AR2, from Svalbard in  
1037 the Arctic Circle. *Journal of bacteriology* 194, 6948-6949.
- 1038 Pelve, E.A., Lindas, A.C., Martens-Habbena, W., De La Torre, J.R., Stahl, D.A., and  
1039 Bernander, R. (2011). Cdv-based cell division and cell cycle organization in the  
1040 thaumarchaeon *Nitrosopumilus maritimus*. *Mol Microbiol* 82, 555-566.
- 1041 Pester, M., Schleper, C., and Wagner, M. (2011). The Thaumarchaeota: an emerging view of  
1042 their phylogeny and ecophysiology. *Curr Opin Microbiol* 14, 300-306.
- 1043 Peters, J.W., Schut, G.J., Boyd, E.S., Mulder, D.W., Shepard, E.M., Broderick, J.B., King,  
1044 P.W., and Adams, M.W. (2015). [FeFe]- and [NiFe]-hydrogenase diversity,  
1045 mechanism, and maturation. *Biochim Biophys Acta* 1853, 1350-1369.

- 1046 Petitjean, C., Deschamps, P., Lopez-Garcia, P., and Moreira, D. (2014). Rooting the domain  
1047 archaea by phylogenomic analysis supports the foundation of the new kingdom  
1048 Proteoarchaeota. *Genome Biol Evol* 7, 191-204.
- 1049 Poli, A., Di Donato, P., Abbamondi, G.R., and Nicolaus, B. (2011). Synthesis, production,  
1050 and biotechnological applications of exopolysaccharides and polyhydroxyalkanoates  
1051 by archaea. *Archaea* 2011, 693253.
- 1052 Prangishvili, D., Bamford, D.H., Forterre, P., Iranzo, J., Koonin, E.V., and Krupovic, M.  
1053 (2017). The enigmatic archaeal virosphere. *Nat Rev Microbiol* 15, 724-739.
- 1054 Prosser, J.I., and Nicol, G.W. (2008). Relative contributions of archaea and bacteria to  
1055 aerobic ammonia oxidation in the environment. *Environ Microbiol* 10, 2931-2941.
- 1056 Qin, W., Amin, S.A., Martens-Habbena, W., Walker, C.B., Urakawa, H., Devol, A.H.,  
1057 Ingalls, A.E., Moffett, J.W., Armbrust, E.V., and Stahl, D.A. (2014). Marine  
1058 ammonia-oxidizing archaeal isolates display obligate mixotrophy and wide ecotypic  
1059 variation. *Proc Natl Acad Sci U S A* 111, 12504-12509.
- 1060 Ramos-Vera, W.H., Weiss, M., Strittmatter, E., Kockelkorn, D., and Fuchs, G. (2011).  
1061 Identification of missing genes and enzymes for autotrophic carbon fixation in  
1062 crenarchaeota. *J Bacteriol* 193, 1201-1211.
- 1063 Raymann, K., Brochier-Armanet, C., and Gribaldo, S. (2015). The two-domain tree of life is  
1064 linked to a new root for the Archaea. *Proc Natl Acad Sci U S A* 112, 6670-6675.
- 1065 Reigstad, L.J., Richter, A., Daims, H., Urich, T., Schwark, L., and Schleper, C. (2008).  
1066 Nitrification in terrestrial hot springs of Iceland and Kamchatka. *FEMS Microbiol*  
1067 *Ecol* 64, 167-174.
- 1068 Rouillon, C., and White, M.F. (2011). The evolution and mechanisms of nucleotide excision  
1069 repair proteins. *Res Microbiol* 162, 19-26.
- 1070 Saier, M.H., Jr., Reddy, V.S., Tamang, D.G., and Vastermark, A. (2014). The transporter  
1071 classification database. *Nucleic Acids Res* 42, D251-258.
- 1072 Samson, R.Y., Dobro, M.J., Jensen, G.J., and Bell, S.D. (2017). The Structure, Function and  
1073 Roles of the Archaeal ESCRT Apparatus. *Subcell Biochem* 84, 357-377.
- 1074 Samson, R.Y., Obita, T., Hodgson, B., Shaw, M.K., Chong, P.L., Williams, R.L., and Bell,  
1075 S.D. (2011). Molecular and structural basis of ESCRT-III recruitment to membranes  
1076 during archaeal cell division. *Mol Cell* 41, 186-196.
- 1077 Schleper, C., Jurgens, G., and Jonuscheit, M. (2005). Genomic studies of uncultivated  
1078 archaea. *Nat Rev Microbiol* 3, 479-488.
- 1079 Schleper, C., and Nicol, G.W. (2010). Ammonia-oxidising archaea--physiology, ecology and  
1080 evolution. *Adv Microb Physiol* 57, 1-41.
- 1081 Shen, T., Stieglmeier, M., Dai, J., Urich, T., and Schleper, C. (2013). Responses of the  
1082 terrestrial ammonia-oxidizing archaeon *Ca. Nitrososphaera viennensis* and the  
1083 ammonia-oxidizing bacterium *Nitrosospira multififormis* to nitrification inhibitors.  
1084 *FEMS Microbiol Lett* 344, 121-129.
- 1085 Shi, Y., Tyson, G.W., Eppley, J.M., and Delong, E.F. (2011). Integrated metatranscriptomic  
1086 and metagenomic analyses of stratified microbial assemblages in the open ocean.  
1087 *ISME J* 5, 999-1013.
- 1088 Shima, S., Herault, D.A., Berkessel, A., and Thauer, R.K. (1998). Activation and  
1089 thermostabilization effects of cyclic 2, 3-diphosphoglycerate on enzymes from the  
1090 hyperthermophilic *Methanopyrus kandleri*. *Arch Microbiol* 170, 469-472.
- 1091 Siguier, P., Perochon, J., Lestrade, L., Mahillon, J., and Chandler, M. (2006). ISfinder: the  
1092 reference centre for bacterial insertion sequences. *Nucleic Acids Res* 34, D32-36.

- 1093 Simon, J., and Klotz, M.G. (2013). Diversity and evolution of bioenergetic systems involved  
1094 in microbial nitrogen compound transformations. *Biochim Biophys Acta* 1827, 114-  
1095 135.
- 1096 Soding, J. (2005). Protein homology detection by HMM-HMM comparison. *Bioinformatics*  
1097 21, 951-960.
- 1098 Sondergaard, D., Pedersen, C.N., and Greening, C. (2016). HydDB: A web tool for  
1099 hydrogenase classification and analysis. *Sci Rep* 6, 34212.
- 1100 Spang, A., Hatzenpichler, R., Brochier-Armanet, C., Rattei, T., Tischler, P., Spieck, E., Streit,  
1101 W., Stahl, D.A., Wagner, M., and Schleper, C. (2010). Distinct gene set in two  
1102 different lineages of ammonia-oxidizing archaea supports the phylum  
1103 Thaumarchaeota. *Trends Microbiol* 18, 331-340.
- 1104 Spang, A., Poehlein, A., Offre, P., Zumbragel, S., Haider, S., Rychlik, N., Nowka, B.,  
1105 Schmeisser, C., Lebedeva, E.V., Rattei, T., Bohm, C., Schmid, M., Galushko, A.,  
1106 Hatzenpichler, R., Weinmaier, T., Daniel, R., Schleper, C., Spieck, E., Streit, W., and  
1107 Wagner, M. (2012). The genome of the ammonia-oxidizing Candidatus  
1108 Nitrososphaera gargensis: insights into metabolic versatility and environmental  
1109 adaptations. *Environ Microbiol* 14, 3122-3145.
- 1110 Stahl, D.A., and Amann, R. (1991). "Development and application of nucleic acid probes.,"  
1111 in *Nucleic acid techniques in bacterial systematics.*, eds. E. Stackebrandt & M.  
1112 Goodfellow. (New York, N.Y: John Wiley & Sons, Inc.), 205-248.
- 1113 Stahl, D.A., and De La Torre, J.R. (2012). Physiology and diversity of ammonia-oxidizing  
1114 archaea. *Annu Rev Microbiol* 66, 83-101.
- 1115 Szabo, Z., Sani, M., Groeneveld, M., Zolghadr, B., Schelert, J., Albers, S.V., Blum, P.,  
1116 Boekema, E.J., and Driessen, A.J. (2007). Flagellar motility and structure in the  
1117 hyperthermoacidophilic archaeon *Sulfolobus solfataricus*. *J Bacteriol* 189, 4305-4309.
- 1118 Tourna, M., Stieglmeier, M., Spang, A., Konneke, M., Schintlmeister, A., Urich, T., Engel,  
1119 M., Schloter, M., Wagner, M., Richter, A., and Schleper, C. (2011). Nitrososphaera  
1120 viennensis, an ammonia oxidizing archaeon from soil. *Proc Natl Acad Sci U S A* 108,  
1121 8420-8425.
- 1122 Treusch, A.H., Leininger, S., Kletzin, A., Schuster, S.C., Klenk, H.P., and Schleper, C.  
1123 (2005). Novel genes for nitrite reductase and Amo-related proteins indicate a role of  
1124 uncultivated mesophilic crenarchaeota in nitrogen cycling. *Environ Microbiol* 7,  
1125 1985-1995.
- 1126 Tripepi, M., Imam, S., and Pohlschroder, M. (2010). Haloferax volcanii flagella are required  
1127 for motility but are not involved in PibD-dependent surface adhesion. *J Bacteriol* 192,  
1128 3093-3102.
- 1129 Vajjala, N., Martens-Habbena, W., Sayavedra-Soto, L.A., Schauer, A., Bottomley, P.J., Stahl,  
1130 D.A., and Arp, D.J. (2013). Hydroxylamine as an intermediate in ammonia oxidation  
1131 by globally abundant marine archaea. *Proc Natl Acad Sci U S A* 110, 1006-1011.
- 1132 Vallenet, D., Calteau, A., Cruveiller, S., Gachet, M., Lajus, A., Josso, A., Mercier, J.,  
1133 Renaux, A., Rollin, J., Rouy, Z., Roche, D., Scarpelli, C., and Medigue, C. (2017).  
1134 MicroScope in 2017: an expanding and evolving integrated resource for community  
1135 expertise of microbial genomes. *Nucleic Acids Res* 45, D517-D528.
- 1136 Vallenet, D., Engelen, S., Mornico, D., Cruveiller, S., Fleury, L., Lajus, A., Rouy, Z., Roche,  
1137 D., Salvignol, G., Scarpelli, C., and Medigue, C. (2009). MicroScope: a platform for  
1138 microbial genome annotation and comparative genomics. *Database (Oxford)* 2009,  
1139 bap021.

- 1140 Van Wolferen, M., Ajon, M., Driessen, A.J., and Albers, S.V. (2013). How  
1141 hyperthermophiles adapt to change their lives: DNA exchange in extreme conditions.  
1142 *Extremophiles* 17, 545-563.
- 1143 Williams, T.A., Szollosi, G.J., Spang, A., Foster, P.G., Heaps, S.E., Boussau, B., Ettema,  
1144 T.J.G., and Embley, T.M. (2017). Integrative modeling of gene and genome evolution  
1145 roots the archaeal tree of life. *Proc Natl Acad Sci U S A* 114, E4602-E4611.
- 1146 Yan, J., Beattie, T.R., Rojas, A.L., Schermerhorn, K., Gristwood, T., Trinidad, J.C., Albers,  
1147 S.V., Roversi, P., Gardner, A.F., Abrescia, N.G.A., and Bell, S.D. (2017).  
1148 Identification and characterization of a heterotrimeric archaeal DNA polymerase  
1149 holoenzyme. *Nat Commun* 8, 15075.
- 1150 Yan, J., Haaijer, S.C., Op Den Camp, H.J., Van Niftrik, L., Stahl, D.A., Konneke, M., Rush,  
1151 D., Sinninghe Damste, J.S., Hu, Y.Y., and Jetten, M.S. (2012). Mimicking the oxygen  
1152 minimum zones: stimulating interaction of aerobic archaeal and anaerobic bacterial  
1153 ammonia oxidizers in a laboratory-scale model system. *Environ Microbiol* 14, 3146-  
1154 3158.
- 1155 Zhang, C.L., Ye, Q., Huang, Z., Li, W., Chen, J., Song, Z., Zhao, W., Bagwell, C., Inskip,  
1156 W.P., Ross, C., Gao, L., Wiegel, J., Romanek, C.S., Shock, E.L., and Hedlund, B.P.  
1157 (2008). Global occurrence of archaeal amoA genes in terrestrial hot springs. *Appl*  
1158 *Environ Microbiol* 74, 6417-6426.
- 1159 Zhou, J., Bruns, M.A., and Tiedje, J.M. (1996). DNA recovery from soils of diverse  
1160 composition. *Appl Environ Microbiol* 62, 316-322.
- 1161 Zolghadr, B., Weber, S., Szabo, Z., Driessen, A.J., and Albers, S.V. (2007). Identification of  
1162 a system required for the functional surface localization of sugar binding proteins with  
1163 class III signal peptides in *Sulfolobus solfataricus*. *Mol Microbiol* 64, 795-806.  
1164  
1165

1166 **Figure Legends**

1167 **Figure 1. Growth of *Ca. N. cavascurens*.** (A) Enrichment cultures with near  
1168 stoichiometric conversion of ammonia to nitrite were paralleled by cell growth, as estimated  
1169 by archaeal 16S rRNA gene copies in qPCR. Gene copies declined once ammonia oxidation  
1170 ceased. Data points for ammonia and nitrite are averages of biological duplicates. Technical  
1171 triplicates of each biological duplicate were done to determine the gene copy number. Error  
1172 bars represent the standard error of the mean. (B) Ammonia and successive nitrite production  
1173 of enrichment cultures with 0.5 mM urea as nitrogen source. On urea as substrate ammonia  
1174 accumulated during the early growth phase and the cultures showed decreasing nitrite  
1175 production rate indicating growth limitation. Ammonia cultures served as control and all data  
1176 points show the mean of biological triplicates with error bars representing the standard error  
1177 of the mean.

1178  
1179 **Figure 2. Optimal growth temperature of *Ca. N. cavascurens*.** (A) Nitrite production  
1180 occurs within the tested temperature range (65 – 78 °C) up to 74°C, with an optimum at 68  
1181 °C. Culture quadruplets were incubated for each tested temperature and the error bars  
1182 represent the standard error of the mean which increases with temperature, indicating an  
1183 increase of the stochastic element within the microbial community. (B) Temperature  
1184 dependance of growth rates showing a maximum of 0.98 d<sup>-1</sup> (24.6 h generation time) at 68 °C  
1185 and the highest growth temperature at 74 °C. Growth rates were calculated by linear  
1186 regression of semi-logarithmically plotted nitrite values during the exponential growth phase  
1187 (min. five different time points).

1188  
1189 **Figure 3. Micrographs of *Ca. N. cavascurens*.** Light (A) and epifluorescence micrographs  
1190 (B) of a late exponential enrichment culture analysed with FISH. *Ca. N. cavascurens* cells  
1191 (red) and bacterial cells (green) were labeled with ARCH 915 and EUB 338 probes  
1192 respectively, to give a representative picture of the enrichment state. Scanning electron  
1193 micrographs (C) and (D) show the spherical nature of *Ca. N. cavascurens* cells, having a  
1194 diameter of 0.6 – 0.8 µm, small rods are visible that belong to the remaining bacterial  
1195 consortium.

1196  
1197 **Figure 4. Phylogenetic position of *Ca. N. cavascurens*, and distribution of the ammonia  
1198 monooxygenase (AMO) and urease gene clusters in Thaumarchaeota genomes.**

1199 This maximum-likelihood tree built with IQ-tree is based on 59 ribosomal proteins found in  
1200 at least 35 genomes out of the 40 genomes dataset. AMO and Urease genes clusters found are  
1201 displayed along the tree. Colors of gene boxes indicate the gene families involved in AMO or  
1202 urease (*amoABCX* and *UreABCDEFG* respectively). Grey boxes correspond to other genes.  
1203 Gene clusters are displayed in the orientation which maximizes the vertical alignment of the  
1204 conserved genes. Genes are represented on an un-interrupted cluster when less than five  
1205 genes separated them, otherwise, genes apart from more than five gene positions are  
1206 displayed on another cluster. For AMO clusters, the number of different *amoC* homologs  
1207 found in the genome outside of the main AMO cluster is indicated in the *amoC* box. Putative  
1208 urea transporters are indicated by grey boxes outlined by blue for SSS-type urea transporter,  
1209 and pink for UT urea transporter. The chaperonin Hsp60 homolog found in the urease cluster  
1210 and discussed in the main text is indicated with a red box underlining its conserved position  
1211 over multiple loci. Note that *N. evergladensis* and *N. viennensis* both have an extra set of  
1212 three urease genes (*UreABC*) not displayed here.

1213



1214 **Figure 5. Metabolic reconstruction of *Ca. N. cavascurensis***

1215 Schematic reconstruction of the predicted metabolic modules and other genome features of  
1216 *Ca. N. cavascurensis*, as discussed in the text. Gene accession numbers and transporter  
1217 classes are listed in Supplementary Table 1. HBCD: 4-hydroxybutyryl-CoA dehydratase;  
1218 cDPG: cyclic 2, 3-diphosphoglycerate; MCP: methyl-accepting chemotaxis proteins; Fla:  
1219 archaellum; Hyd3b: type 3b hydrogenase complex; polY: Y-family translesion polymerase;  
1220 HR: homologous recombination; NER: nucleotide excision repair; BER: base excision repair;  
1221 S\*: organosulfur compounds, sulfite, sulfate.

1222

1223 **Figure 6. Effect of the NO scavenger 2-phenyl-4, 4, 5, 5-tetramethylimidazoline-1-oxyl**  
1224 **3-oxide (PTIO) on nitrite production.** Different concentrations of PTIO were added after  
1225 63 h in early to mid-exponential growth phase indicated by the arrow. Cultures with 20  $\mu$ M  
1226 PTIO resumed nitrite production 72 h after the addition of PTIO, while higher concentrations  
1227 resulted in a complete arrest. Nitrite curves of control and 20  $\mu$ M PTIO cultures show mean  
1228 values from duplicates, whereas 100 and 400  $\mu$ M curves are from triplicates and error bars  
1229 represent the standard error of the mean.

1230

1231 **Figure 7. Genomic regions of atypical GC% content contain mobile genetic elements in**  
1232 ***Ca. N. cavascurensis*.** The genome is displayed in the form of a ring where genes are colored  
1233 by functional categories (arCOG and COG), with the mean GC% content (blue circle) and  
1234 local GC% as computed using 5kb sliding windows (black graph) in inner rings. The minimal  
1235 and maximal values of local GC% are displayed as dashed grey concentric rings. The  
1236 predicted origin of replication is indicated with "Ori". Several large regions show a deviation  
1237 to the average GC% that correspond to mobile genetic elements, i.e. ICEs (integrated  
1238 conjugated elements), a specific pilus (see Fig. 8), and a defense system (CRISPR-Cas Type  
1239 IB and three CRISPR arrays (see text).

1240

1241 **Figure 8. Mobile genetic elements and cell appendages encoded in the genome of *Ca. N.***  
1242 ***cavascurensis*.**

1243 (A) Two putative Integrative Conjugative Elements (ICE) with sequence similarities shown  
1244 by connexions between the two. Genes are colored by function (see legend). CHLP:  
1245 geranylgeranyl diphosphate reductase; GGPS: geranylgeranyl pyrophosphate synthetase;  
1246 UbiC: chorismate lyase; UbiA: 4-hydroxybenzoate octaprenyltransferase; RmlB: dTDP-  
1247 glucose 4,6-dehydratase; UbiE: Ubiquinone/menaquinone biosynthesis C-methylase; HslU:  
1248 ATP-dependent HslU protease; PflA: Pyruvate-formate lyase-activating enzyme; SuhB:  
1249 fructose-1,6-bisphosphatase; TrxB: Thioredoxin reductase; YyaL: thioiredoxin and six-hairpin  
1250 glycosidase-like domains; BCAT: branched-chain amino acid aminotransferase; PncA:  
1251 Pyrazinamidase/nicotinamidase; SseA: 3-mercaptopyruvate sulfurtransferase; ThyX:  
1252 Thymidylate synthase; CzcD: Co/Zn/Cd efflux system. (B) A head-tail like provirus from the  
1253 Caudovirales order with genes in blue indicating putative viral functions. (C) *Ca. N.*  
1254 *cavascurensis* specific type IV pilus locus next to a set of chemotaxis and flagellum  
1255 (archaellum) genes. Homologs shared between the flagellum and the T4P are displayed with  
1256 the same color. A scheme of the putative type IV pilus is shown on the left with the same  
1257 color code. (inspired from drawings in (Makarova et al., 2016). mb: membrane; cyto:  
1258 cytoplasm; MCP: methyl-accepting chemotaxis proteins.

1259

1260 **Supplementary Material**

1261 **Supplementary Figure 1. Bioinformatic genome closure in a repeat-rich region encoding**  
1262 **a hypothetical adhesin.** (A) The two initially assembled contigs were aligned using  
1263 MUMMER (Kurtz et al., 2004), revealing a sequence overlap with very high sequence  
1264 identity (>99.5%) that could be resolved and resulted in the genome closure: contig 2 was a  
1265 redundancy, and contig 1 was circularized through a long gene carrying repeated sequences  
1266 (B) Analysis of this long gene showed that it encodes for an adhesin (a likely surface protein  
1267 involved in adhesion). As is typical for such proteins, it contains several repeats including  
1268 LamG/concavalin A domains interspersed with Ca<sup>2+</sup>-binding cadherin domains (both  
1269 involved in adhesion) and terminates with two phospholipase D domains (PLD).

1270  
1271 **Supplementary Figure 2. Phylogenetic tree of the 4-hydroxybutyryl-CoA dehydratase**  
1272 **protein family.** A maximum likelihood phylogenetic tree was obtained with IQ-Tree v 1.5.5.  
1273 The groups previously defined in (Konneke et al., 2014) "CREN type-1", "CREN type-2",  
1274 "Anaerobe cluster", and "AOA" are indicated by red boxes. The organisms' class and phylum  
1275 are indicated for each sequence along brackets on the right. The two homologs of this enzyme  
1276 found in *Ca. N. cavascurensis* genome are indicated by a red arrow. This figure was  
1277 generated using the Siptree program (Chevenet et al., 2010), and the resulting SVG file  
1278 modified using Inkscape.

1279  
1280 **Supplementary Table 1** (supplied as an excel file). Locus tags and annotations of the main  
1281 metabolic and biosynthetic pathways, information processing genes and transporters of *Ca.*  
1282 *Nitrosocaldus cavascurensis*.

1283

Figure 1

A

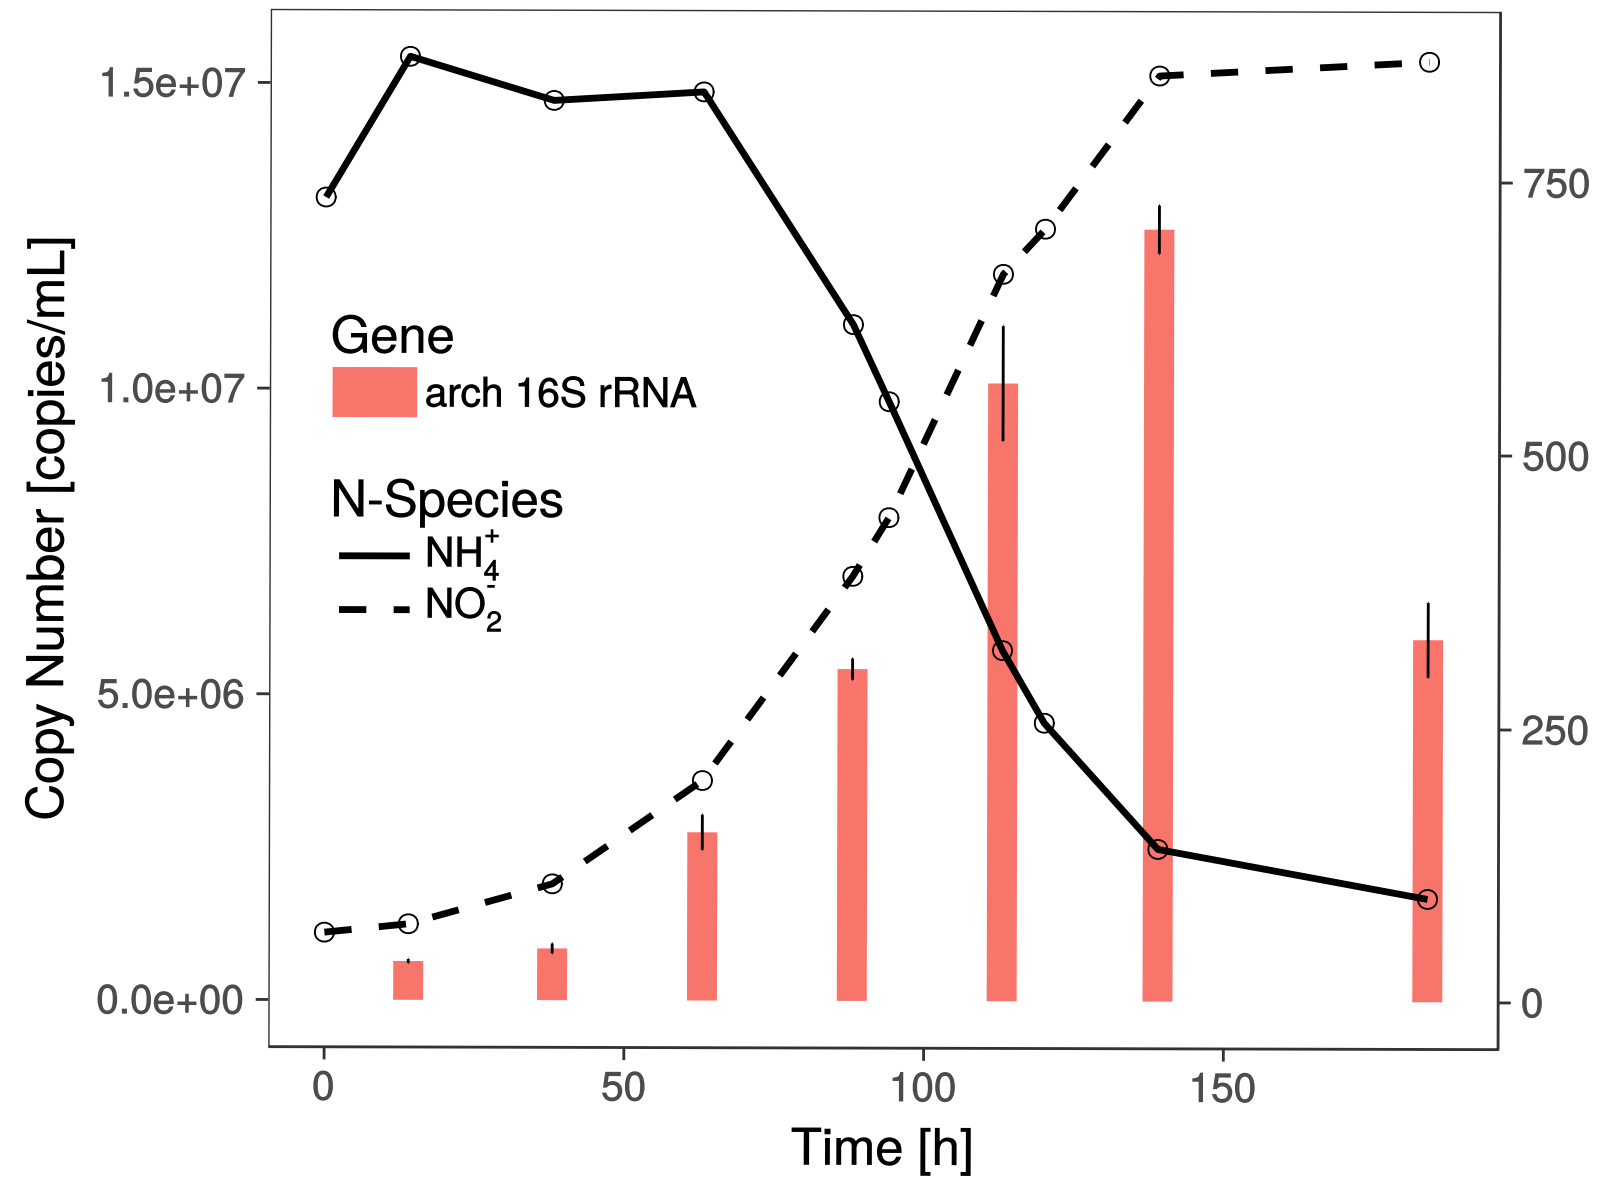

B

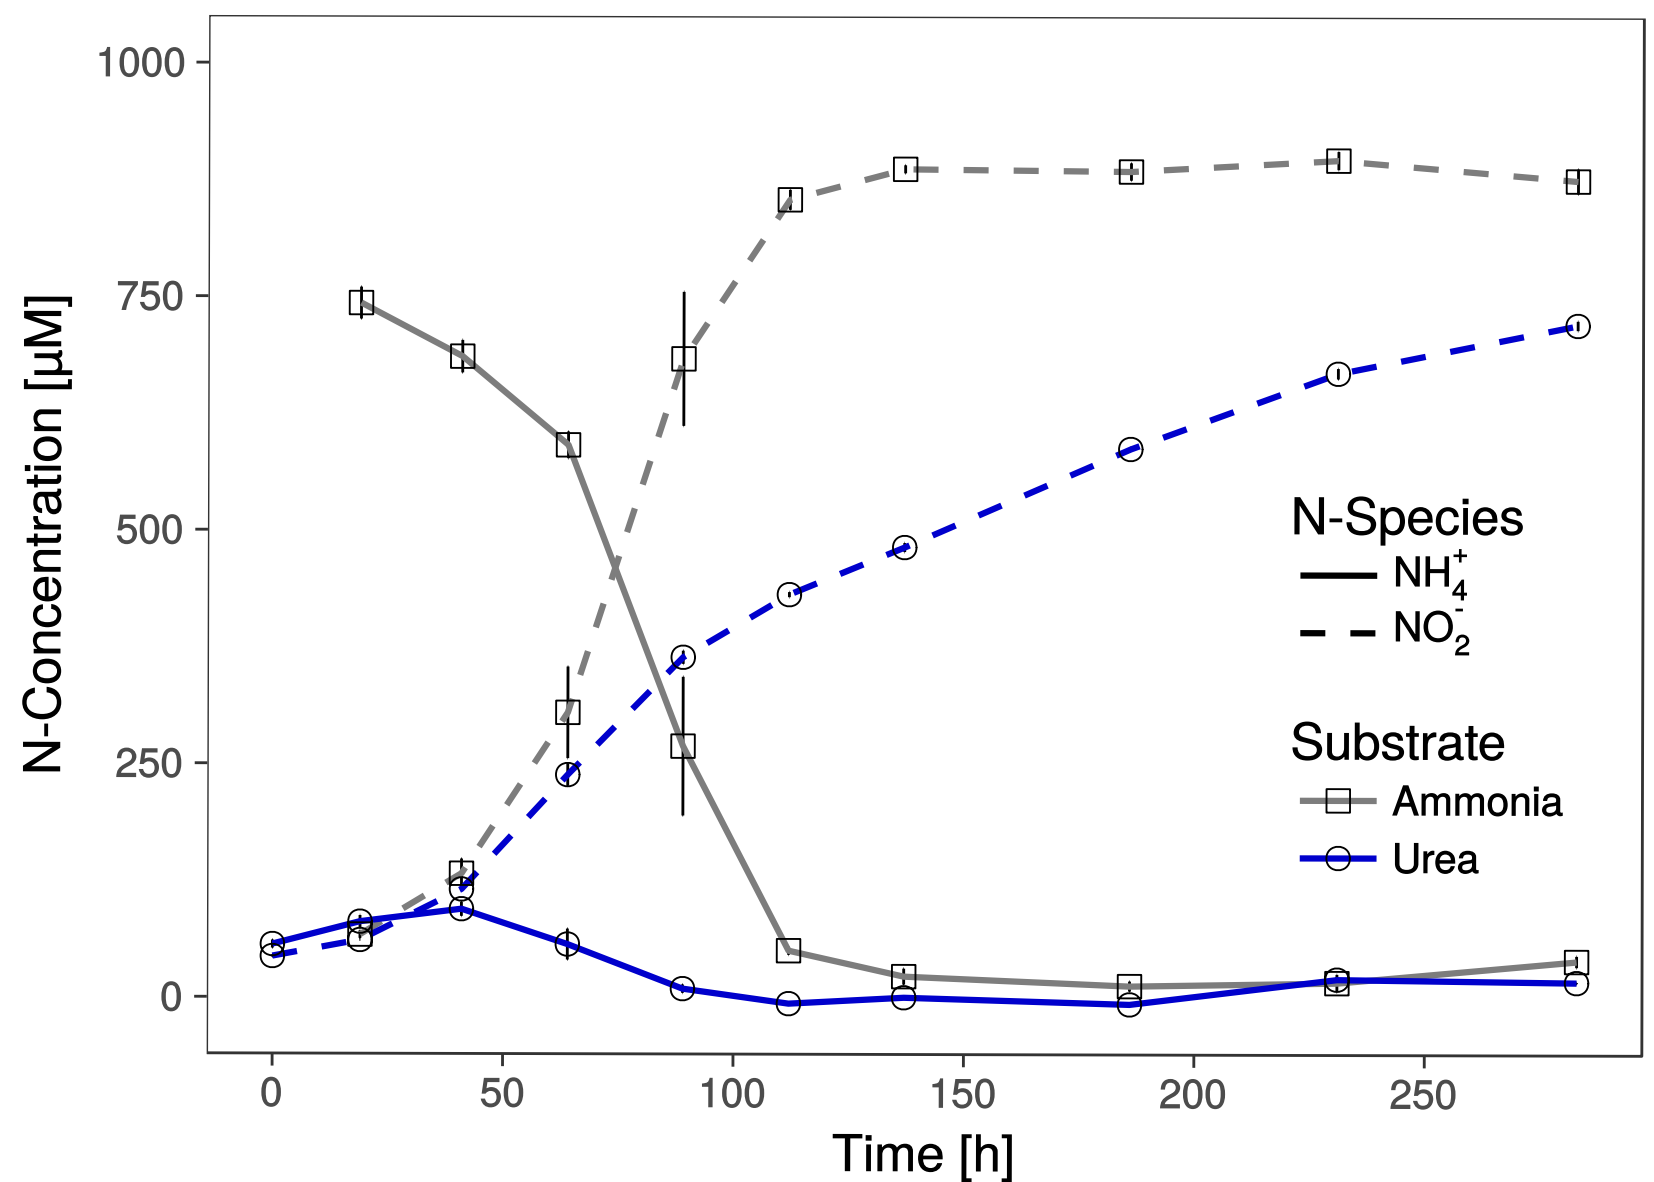

**A**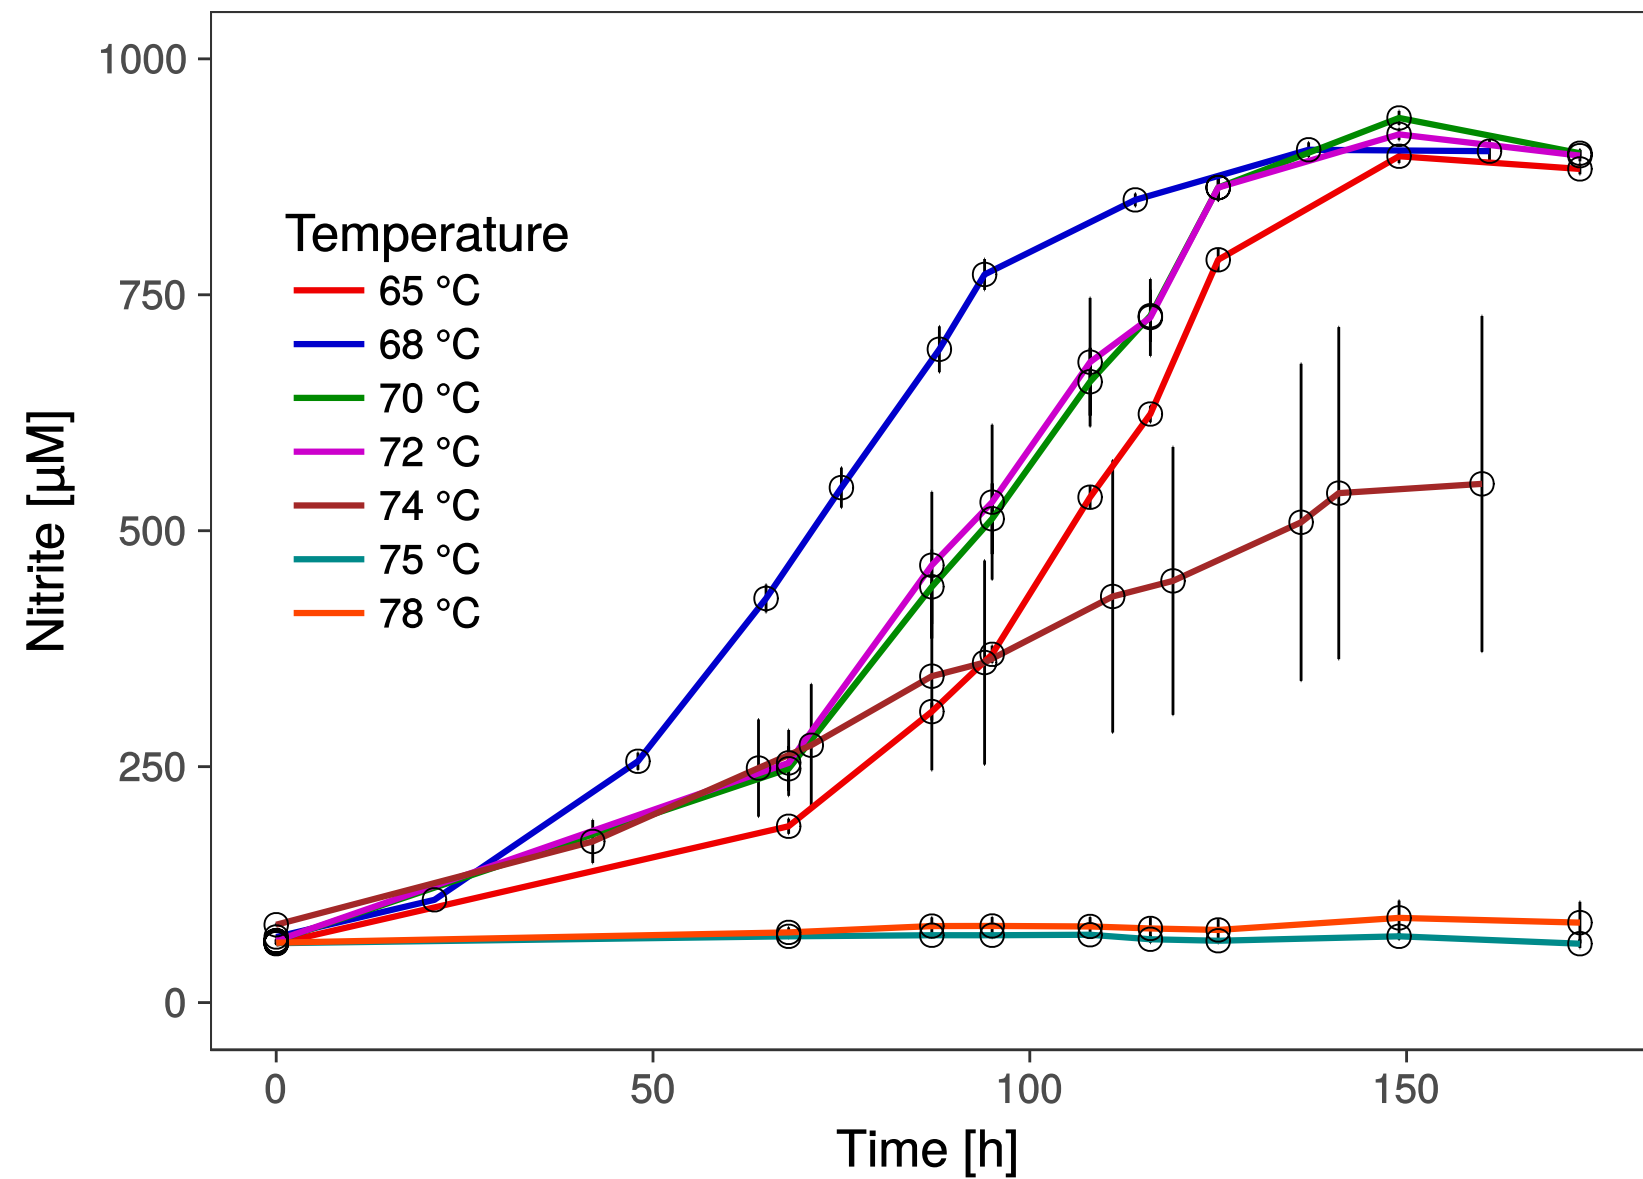**B**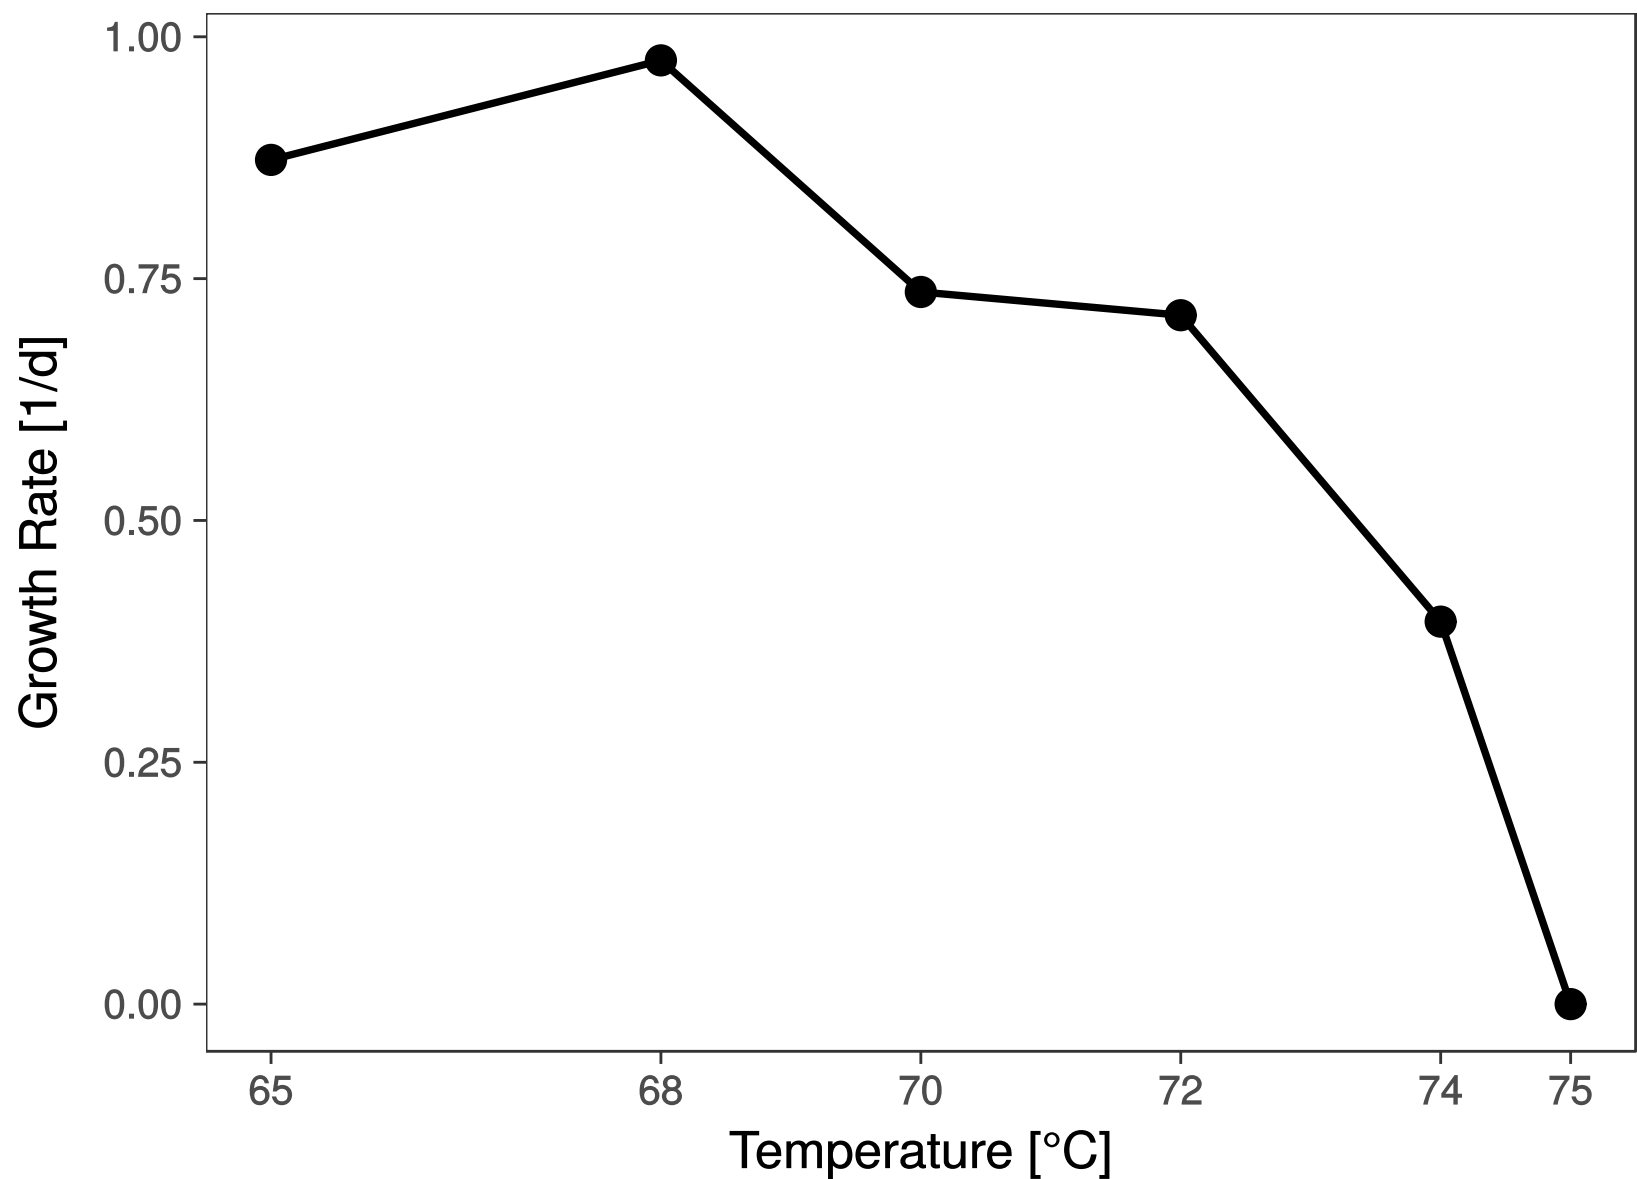**Figure 2**



## Figure 3

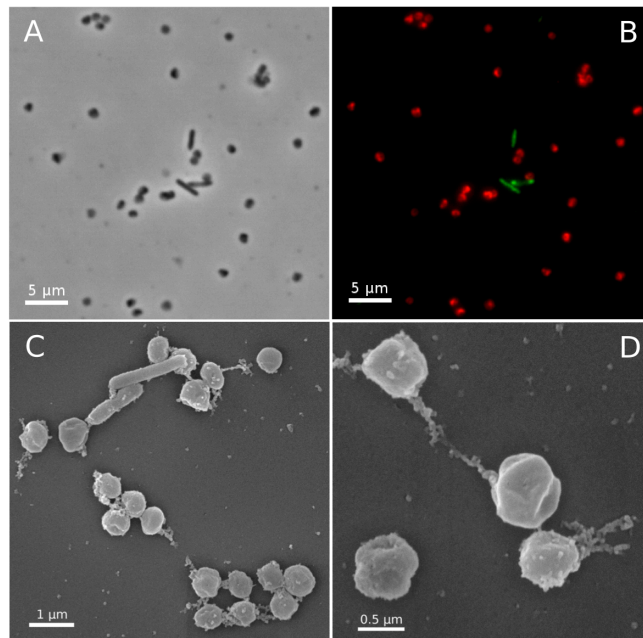

● UF-boot/aLRT support < 100

0.3 subst/site

AMO operon

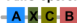

1000 aa

Urease operon

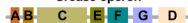

Figure 4

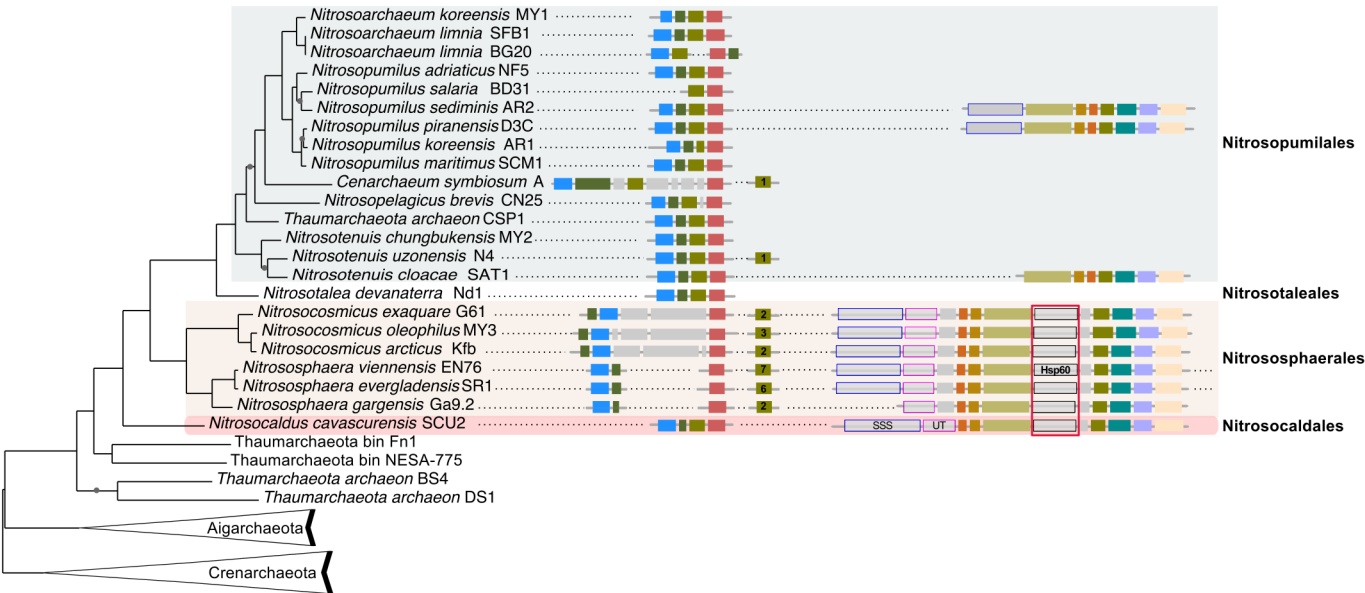

**Figure 5**

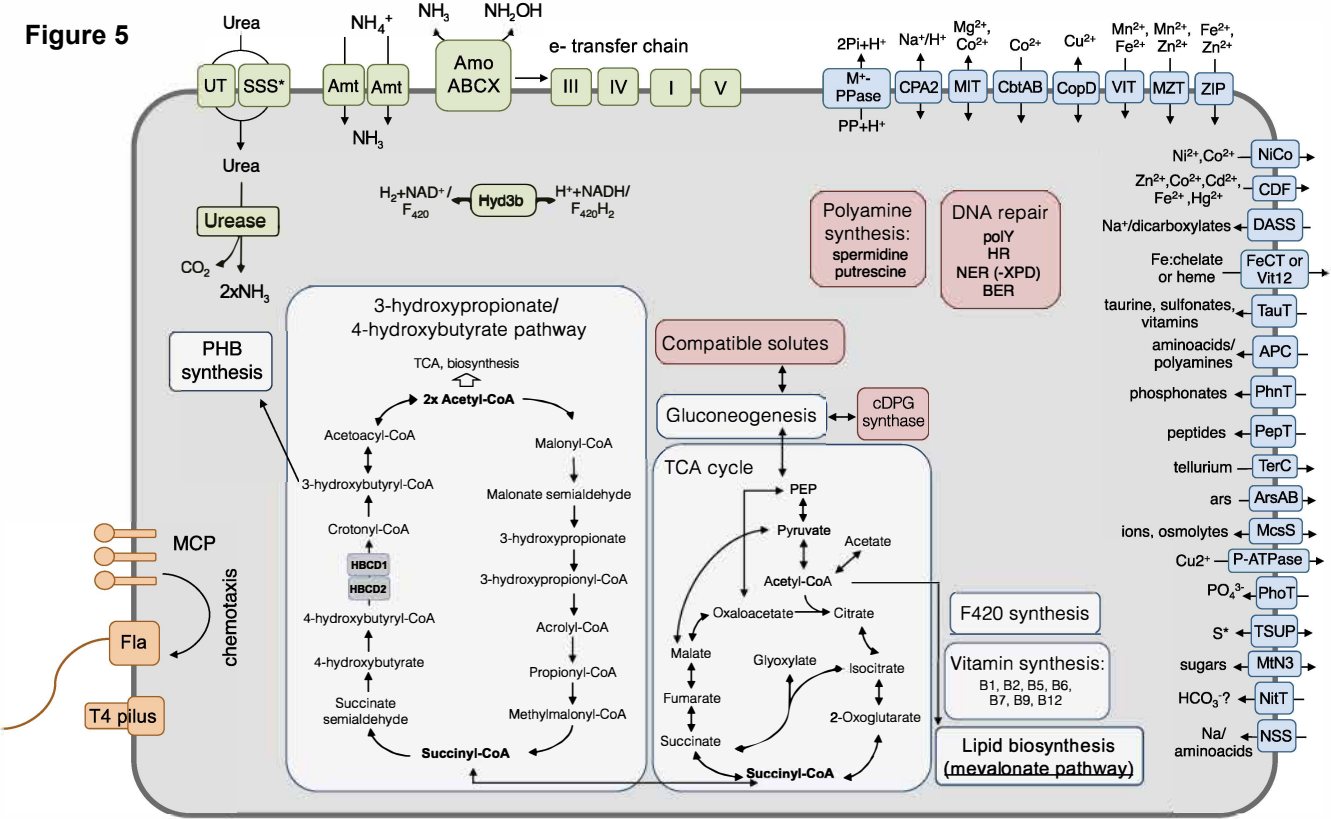

Key:

□ central C metabolism, synthesis of essential cofactors and vitamins

□ energy metabolism

□ thermophilic adaptations & DNA repair systems

□ motility & chemotaxis

□ transporter families

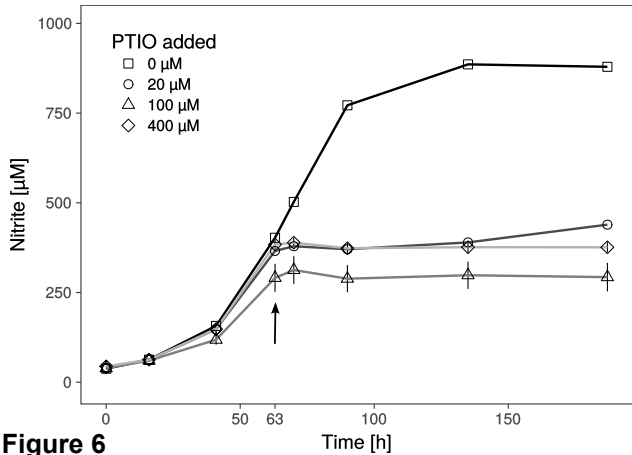

**Figure 6**



Genes by functional categories:

- Informational
- Metabolism
- Cellular
- Uncharacterized

Figure 7

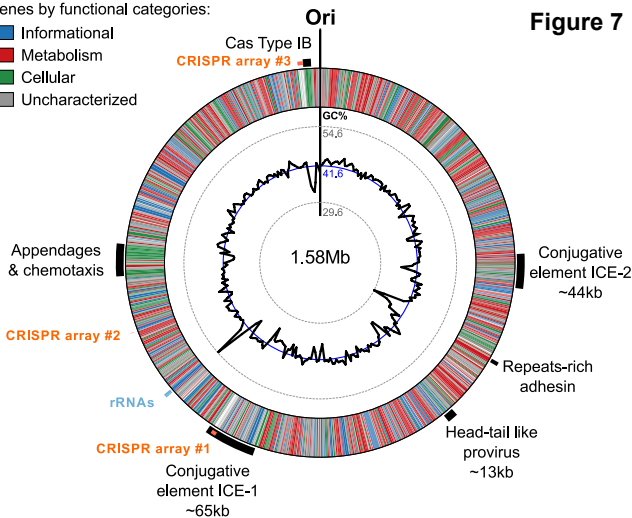

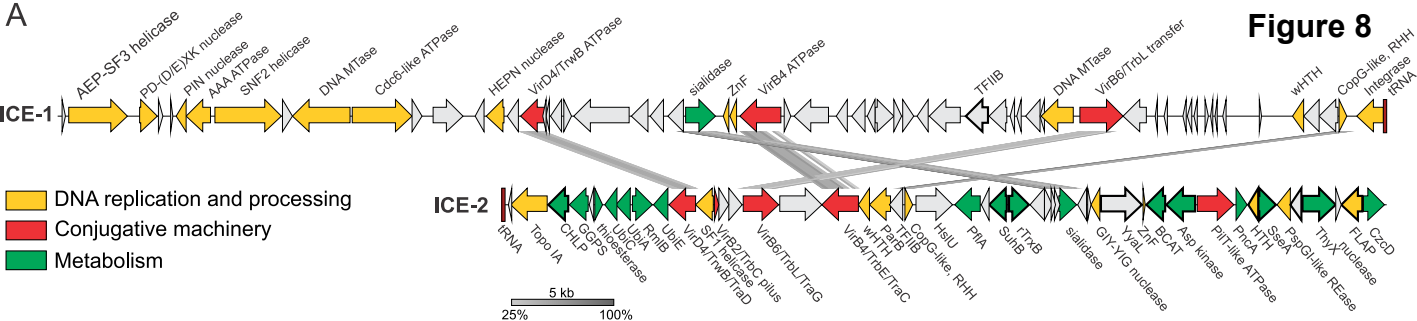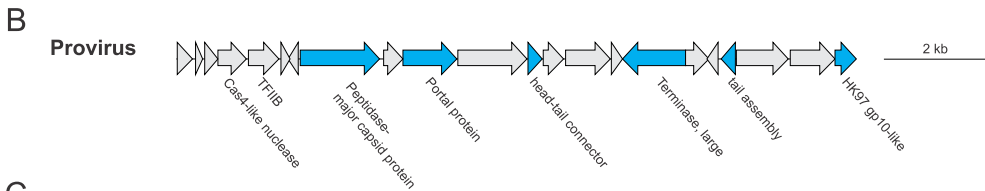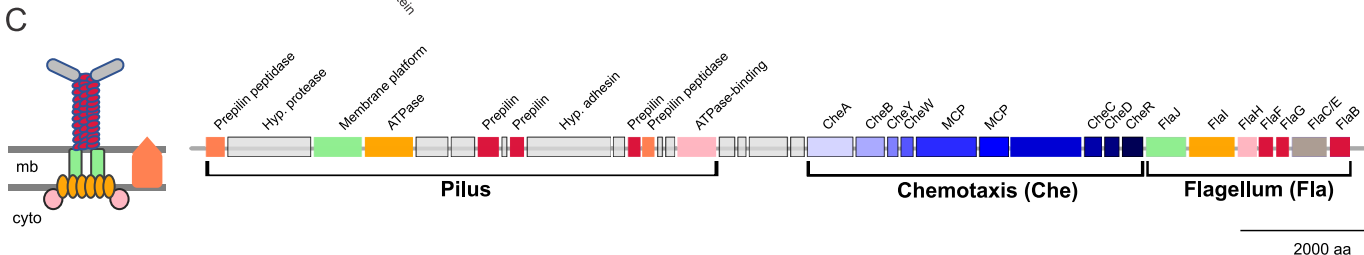

Source: http://biorxiv.org/content/10.1101/240879v1.full.pdf
